# Supplementary material for: Global Sequestration Potential of Increased Organic Carbon in Cropland Soils
Source: PubMed Central journal article supplement (PMC5686149; doi:10.1038/s41598-017-15794-8), 2017-11-14
Supplement: 41598_2017_15794_MOESM1_ESM.pdf [file 41598_2017_15794_MOESM1_ESM.pdf]

# Global Sequestration Potential of Increased Organic Carbon in Cropland Soils

## Supplementary Materials

October 21, 2017

**Submitted to:**  
Scientific Reports

Authors:

Robert J. Zomer <sup>1\*</sup>, Deborah Bossio<sup>2</sup>, Rolf Sommer<sup>3</sup>, Lou Verchot<sup>4</sup>

1. *Key Laboratory for Plant Diversity and Biogeography of East Asia (KLPB), Kunming Institute of Botany, Chinese Academy of Science, Kunming 650201, Yunnan, China Email: r.zomer@cgiar.org*
2. *The Nature Conservancy (TNC), Santa Cruz, California*
3. *International Center for Tropical Agriculture (CIAT), Soils Division, Nairobi, Kenya*
4. *International Center for Tropical Agriculture (CIAT), Cali, Colombia*

\* Corresponding Author

## Table of Contents

|                                                                                                      |           |
|------------------------------------------------------------------------------------------------------|-----------|
| <b>Methods:</b> .....                                                                                | <b>3</b>  |
| Data sources:.....                                                                                   | 4         |
| <i>Soils Data: SoilGrids250m</i> .....                                                               | 4         |
| <i>Landcover Data: Global Land Cover-SHARE - Beta-Release 1.0 (Year 2014)</i> .....                  | 4         |
| <i>Administrative Boundaries: GADM</i> .....                                                         | 5         |
| Data Processing Steps: .....                                                                         | 6         |
| <i>Calculating Increase at 20 years:</i> .....                                                       | 6         |
| <i>Calculating tons of carbon (t C or Pg C) per region/country:</i> .....                            | 7         |
| <b>Supplementary Tables:</b> .....                                                                   | <b>8</b>  |
| Table S1: Regional Analysis of High SOC Soils: .....                                                 | 8         |
| Table S2: National Analysis of SOC on Available Cropland Soils: .....                                | 9         |
| Table S3: Top fifty countries with the highest total SOC on croplands, currently.....                | 13        |
| Table S4: Top fifty countries with the highest total annual increment of SOC increase.....           | 14        |
| Table S5: Top fifty countries with the highest total annual increment of SOC increase per hectare. . | 15        |
| Table S6: Top forty countries with the highest total area of high SOC soils. ....                    | 16        |
| <b>Supplementary Figures:</b> .....                                                                  | <b>17</b> |
| Figure S1: High soil organic carbon (SOC) and sandy soils. ....                                      | 17        |
| Figure S2: Annual increase in soil organic carbon (SOC) – Africa .....                               | 18        |
| Figure S3: Annual increase in soil organic carbon (SOC) – South America .....                        | 19        |
| Figure S4: Annual increase in soil organic carbon (SOC) – South Asia. ....                           | 20        |
| Figure S5: Annual increase in soil organic carbon (SOC) – Southeast Asia.....                        | 21        |
| Figure S6: Annual increase in soil organic carbon (SOC) – East Asia. ....                            | 22        |
| Figure S7: Annual increase in soil organic carbon (SOC) – Europe.....                                | 23        |
| Figure S8: Annual increase in soil organic carbon (SOC) – North America.....                         | 24        |
| Figure S9: Annual increase in soil organic carbon (SOC) – Australia .....                            | 25        |
| <b>References</b> .....                                                                              | <b>26</b> |

## Methods:

The geospatial modeling and analysis uses the equation for potential carbon sequestration delineated in Sommer and Bossio (2014) as the estimate of the potential attainable increase of SOC on croplands after twenty years<sup>1</sup>. These starting estimates, i.e. 0.27 increase for the medium scenario and 0.54 increase for the high scenario, are used to determine the estimate of SOC sequestration potential in tons of carbon (or Pg C), on a grid cell by grid cell basis. The SoilsGrid250m SOC and bulk density datasets were used to parameterize the conversion from SOC as a percent of the top 30cm soil depth layer, to SOC in t C (or PgC for the global results). Only the medium and high sequestration scenarios pertinent to croplands are presented, since the low scenario in Sommer and Bossio (2014) refers to sequestration rates for unimproved pasture land. SOC sequestration<sup>1</sup>. We have estimated the increase after a 20-year time span in order to provide an operational description of the linear portion of the SOC sequestration curve, noting that the rate of increase is likely to decrease sometime thereafter and eventually reach a new equilibrium (Figure 3).

The increase in %-SOC in response to improved management or other sequestration measures was described in Sommer and Bossio (2014) with a four-parameter sigmoid function of the form<sup>1</sup>:

$$\text{SOC} = \text{SOC}_0 + \frac{a}{1 + e^{-\frac{t-t_0}{b}}} \quad (1)$$

where  $\text{SOC}_0$  is the initial soil organic carbon content (%),  $a$  and  $b$  are empirical constants and  $t$  the time expressed in years.  $t_0$  is the year where the slope of the curve is largest, i.e. the annual sequestration rate highest. The parameters for the two scenarios (based upon Sommer and Bossio 2014), were:

$$\text{Medium:} \quad \text{SOC}_0 = 0.71; \quad a = 0.697; \quad b = 11.5; \quad t_0 = 4$$

$$\text{High:} \quad \text{SOC}_0 = 0.60; \quad a = 1.20; \quad b = 9.8; \quad t_0 = 7$$

The percent increase of SOC after 20 years ( $T_{20}$ ) was calculated from this curve for the two scenarios as:

$$\text{Medium:} \quad T_{20} = 0.269663$$

$$\text{High:} \quad T_{20} = 0.553936$$

Bulk density was used to first convert SOC (t/ha) (as presented in the SoilsGrid250m data) into SOC (%). The estimated percentage increase was then added, and the result was then converted back in SOC (t/ha).

High SOC soils were mapped in a separate layer by identifying grid cells with a weighted average bulk density (0-30 cm) equal to or less than 1.0 kg/m<sup>3</sup>, and /or any grid cells with more than 400 t C/ha. These high carbon soils were excluded from further analysis. Sandy

soils were mapped in a separate layer by identifying grid cells with sand content (at 15 cm) equal to or greater than 85%, and likewise, were excluded from further analysis.

All result grids converted to World Sinusoidal projection to allow for area calculations. The GLCShare – Dominant (Class 2 = Cropland) dataset, in percent area of a 1 km grid cell, was resampled to 250m and multiplied times the various results (t/ha) to calculate actual total tC in each grid cell, i.e. given the actual area of cropland in that grid cell. The sum of grid cells was then multiplied by the number of hectares to provide regional and country zonal statistics. A full description of the geospatial methodology used to calculate the cropland area, percent SOC, the conversion to tons per hectare, and the aggregation of tons of SOC on cropland is given in the Supplemental Materials. All results datasets, including high resolution maps, are available online at: <http://ciat.cgiar.org/global-soil-carbon>

#### Data sources:

Soils Data: SoilGrids250m

Data downloaded from: <http://soilgrid.org>

#### Layers:

Soil organic carbon stock in tonnes per ha

Depth\_1: 0 - 5 cm

Depth\_2: 5 - 15 cm

Depth\_3: 15 – 30 cm

Bulk density (fine earth) in kg / m<sup>3</sup>

Depth\_2: 5 cm

Depth\_3: 15 cm

Depth\_4: 30 cm

Resolution = 250 m

#### Reference:

Hengl, T., Mendes de Jesus, J., Heuvelink, G. B.M., Ruiperez Gonzalez, M., Kilibarda, M. et al. (2017) SoilGrids250m: global gridded soil information based on Machine Learning. PLoS ONE 12(2): e0169748. doi:10.1371/journal.pone.0169748<sup>2</sup>.

Landcover Data: Global Land Cover-SHARE - Beta-Release 1.0 (Year 2014)

Dataset Manual: <http://www.fao.org/land-water/land/land-governance/land-resources-planning-toolbox/category/details/en/c/1036355/>

Data downloaded from: <http://www.fao.org/geonetwork/srv/en/main.home?uuid=ba4526fd-cdbf-4028-a1bd-5a559c4bff38>

Layers: GlcShare\_v10\_Dominant (used in analysis)

Dominant Landcover Type within Grid Cell

GlcShare\_v10\_02

Percent of Grid Cell under Cropland

Resolution = 30 arc-seconds (~1 sq.km)

*Reference:*

Latham J, Cumani R, Rosati I, Bloise M (2014) FAO Global Land Cover (GLC-SHARE) Beta-Release 1.0 Database, Version 1.0 - 2014 (Land and Water Division, FAO, Rome)<sup>3</sup>.

The “Croplands” designation within the GLC-SHARE is an aggregated category based upon the UN Land Cover Classification System (LCCS v1x), which includes: *Herbaceous Crops*: The class is composed of a main layer of cultivated herbaceous plants (graminoids or forbs). It includes herbaceous crops used for hay. All the non-perennial crops that do not last for more than two growing seasons and crops like sugar cane where the upper part of the plant is regularly harvested while the root system can remain for more than one year in the field are included in this class.

*Woody Crops*: The class is composed of a main layer of permanent crops (trees and/or shrub crops) and includes all types of orchards and plantations (fruit trees, coffee and tea plantation, oil palms, rubber plantation, Christmas trees etc.).

*Multiple or Layered crops*: This class combines different land cover situations:

Two layers of different crops (woody + herbaceous): A common case is the presence of one layer of woody crops (trees or shrubs) and another layer of herbaceous crop, such as for wheat fields with olive trees in the Mediterranean area and intense horticulture, oasis or typical coastal African agriculture where herbaceous fields are covered by palm trees, etc.

Presence of one important layer of natural vegetation (mainly trees) that cover one layer of cultivated crops: A typical example are coffee plantations shadowed by natural trees in the equatorial area of Africa.

The Global Land Cover SHARE Beta-Release v1.0 (GLC\_SHARE) fractional landcover geospatial database (at 1 km resolution), developed as an up-to-date amalgamation of the “best available data” by FAO, identifies about 16.3 million km<sup>2</sup> of cropland globally, roughly corresponding to non-spatially collected statistics provided by FAO for “arable and permanently cropped” area for the year 2013 (FAOSTAT, 2016). This accounts for about a third of the total of 49 million km<sup>2</sup> reported by FAO for total global cropland area in 2013 (but which includes large areas of pasture and grasslands). The designation “cropland” is an aggregated category based upon the UN Land Cover Classification System (LCCS v1x), which includes herbaceous crops, woody crops, and multiple or layered crops. The 16 million km<sup>2</sup> of cropland globally identified by the GLC-Share Database is a fairly conservative estimate, e.g. compared to the 22 million km<sup>2</sup> of cropland area identified in the widely used GLC2000. The GLC-Share estimate of cropland which we use in our analysis is more likely to be restricted to just cropped area (i.e. not agroforestry, tree crops, mixed farming, pastures or other grazing areas), and most recent global landcover database available.

*Administrative Boundaries*: GADM The GADM database of Global Administrative Areas v 2.8 was used to analyze results by regions and countries<sup>4</sup>.

Data downloaded from: <http://gadm.org>

## Data Processing Steps:

Geoprocessing resolution - all steps and results: 0.002083333 degree (250 m in World Sinsoidal projection )

All steps only process grid cells with a landcover type of "Cropland"

GlcShare\_v10\_Dominant: Value = 2

All geoprocessing is done separately for each of 3 soil depth layers, which are added together in the last steps to make up the 30 cm soil depth layer

High SOC soils, e.g. peat soils or Histosols, were excluded from the analysis by

- a.) excluding grid cells with a weighted average bulk density (0-15 cm) of less than 1.0
- b.) excluding grid cells with greater than 400 t/ha of SOC

Sandy soils. i.e. soils with  $\geq 85\%$  sand content at 15 cm depth, were likewise excluded

## Calculating Increase at 20 years:

Percent increase after 20 years calculated from the curve in Sommers and Bossio (2016) for two scenarios (see associated Excel spreadsheet):

Medium:  $T_{20} = 0.269663$

High:  $T_{20} = 0.553936$

### 1.) Converting SOC t/ha to SOC (%)

$$\text{soc\_}\%_1 = (((\text{soc}_1 / (\text{soil\_bd}_1 * 10000 * \text{depth}_1)) * 100) * 1000)$$

Where:

$\text{soc}_1$  = soc (t/ha) at depth<sub>1</sub>  
 $\text{soil\_bd}$  = soil bulk density at depth<sub>1</sub>

### 2.) Adding percent increase at $t_{20}$

$$\text{soc\_}\%_{t_{20}_1} = (\text{soc\_}\%_1 + t_{20})$$

Where:

$\text{soc\_}\%_{t_{20}_1}$  = soc (%) at  $t_{20}$

### 3.) Converting SOC(%) at $t_{20}$ to SOC t/ha

$$\text{soc}_{t_{20}_1} = ((\text{soc\_}\%_{t_{20}_1} / 100) * (10000 * \text{soil\_bd}_1 * \text{depth}_1) / 1000)$$

Where:

$\text{soc}_{t_{20}_1}$  = soc (t/ha) at  $t_{20}$

4.) Adding depth layers together to make 0-30 cm depth layer"

$$\text{soc\_t}_0\text{\_30cm} = (\text{soc\_1} + \text{soc\_2} + \text{soc\_3})$$

$$\text{soc\_t}_{20}\text{\_30cm} = (\text{soc\_t}_{20}\text{\_1} + \text{soc\_t}_{20}\text{\_2} + \text{soc\_t}_{20}\text{\_3})$$

5.) Calculating increase in SOC at year 20

$$\text{soc\_diff\_30cm} = (\text{soc\_t}_{20}\text{\_30cm} - \text{soc\_t}_0\text{\_30cm})$$

6.) Identifying high carbon soils

High SOC soils, e.g. peat soils, Histosols, or Andosols, were mapped in a separate layer by identifying grid cells with a weighted average bulk density (0-30 cm) equal to or less than 1.0 g/cm<sup>3</sup>, and /or any grid cells with more than 400 t C/ha. These high carbon soils were excluded from further analysis.

7.) Identifying sandy soils

Sandy soils were mapped in a separate layer by identifying grid cells with sand content (at 15 cm) equal to or greater than 85%. These high sand content soils were excluded from further analysis.

Calculating tons of carbon (t C or Pg C) per region/country:

8.) All result grids converted to World Sinusoidal projection to allow for area calculations

9.) GLCShare – Dominant (Class 2 = Cropland) in percent area of 1 km grid cell, resampled to 250m and multiplied times the various results (t/ha) to calculate actual total tC in each grid cell, i.e. given the area of cropland in that grid cell.

$$\text{soc\_t}_x * \text{GLCShare (\% ag land in grid cell)} = \text{Actual tC per grid cell}$$

10.) Sum of grid cells, multiplied 6.25 (the number of hectares in a 250 m grid cell), to provide regional and country zonal statistics.

## Supplementary Tables:

**Table S1: Regional Analysis of High SOC Soils:** Soil organic carbon (SOC) for all available cropland soils regionally (i.e. those not excluded from the analysis as high SOC or sandy soils), showing the regional totals and averages, at current status ( $T_0$ ) and after 20 years ( $T_{20}$ ), for the medium and high sequestration scenarios, and their annual increment.

| Agricultural Land<br>High SOC Soils | Total Soil Organic Carbon | Average per Hectare | Agricultural<br>Area<br>(km <sup>2</sup> ) |
|-------------------------------------|---------------------------|---------------------|--------------------------------------------|
|                                     | $T_0$                     | $T_0$               |                                            |
| Region                              | PgC                       | t/ha                |                                            |
| Australian / Pacific                | 0.32                      | 189.3               | 16,918                                     |
| Central America                     | 0.01                      | 167.1               | 694                                        |
| Central Asia                        | 0.08                      | 379.5               | 2,195                                      |
| East Asia                           | 0.16                      | 250.9               | 6,249                                      |
| Eastern and Southern Africa         | 0.08                      | 134.9               | 5,624                                      |
| Europe                              | 0.51                      | 253.8               | 19,909                                     |
| North Africa                        | 0.00                      | 354.3               | 1                                          |
| Russia                              | 2.01                      | 278.6               | 72,202                                     |
| South America                       | 0.49                      | 161.8               | 30,008                                     |
| South Asia                          | 0.05                      | 255.3               | 1,939                                      |
| SouthEast Asia                      | 4.08                      | 261.2               | 156,138                                    |
| West and Central Africa             | 0.06                      | 169.7               | 3,460                                      |
| Western Asia                        | 0.02                      | 325.7               | 587                                        |
| North America                       | 0.48                      | 313.2               | 15,304                                     |
| Global                              | 8.34                      | 251.6               | 331,227                                    |
|                                     |                           |                     |                                            |



**Table S2: National Analysis of SOC on Available Cropland Soils:** Soil organic carbon (SOC) for all available cropland soils by country (i.e. those not excluded from the analysis as high SOC or sandy soils), showing the regional totals and averages, at current status ( $T_0$ ) and after 20 years ( $T_{20}$ ), for the medium and high sequestration scenarios, and their annual increment.

| Available Soils                    | Total Soil Organic Carbon         |       |                 | Annual Increment |        | Average per Hectare |       |                 | Annual Increment |        | Agricultural Area (km <sup>2</sup> ) |
|------------------------------------|-----------------------------------|-------|-----------------|------------------|--------|---------------------|-------|-----------------|------------------|--------|--------------------------------------|
|                                    | Region                            | $T_0$ | Medium $T_{20}$ | High $T_{20}$    | Medium | High                | $T_0$ | Medium $T_{20}$ | High $T_{20}$    | Medium |                                      |
| Country                            | Megatons (t C * 10 <sup>6</sup> ) |       |                 |                  |        | tC/ha               |       |                 |                  |        |                                      |
| <b>Australia / Pacific</b>         |                                   |       |                 |                  |        |                     |       |                 |                  |        |                                      |
| Australia                          | 3,418                             | 4,143 | 4,907           | 36.23            | 74.46  | 54                  | 65    | 77              | 0.57             | 1.17   | 634,882                              |
| Fiji                               | 16                                | 17    | 19              | 0.07             | 0.15   | 106                 | 116   | 126             | 0.49             | 1.01   | 1,472                                |
| New Caledonia                      | 1                                 | 1     | 1               | 0.01             | 0.01   | 82                  | 93    | 104             | 0.53             | 1.08   | 132                                  |
| New Zealand                        | 235                               | 250   | 266             | 0.74             | 1.53   | 145                 | 154   | 164             | 0.46             | 0.94   | 16,244                               |
| Papua New Guinea                   | 72                                | 78    | 84              | 0.28             | 0.58   | 119                 | 128   | 138             | 0.47             | 0.96   | 6,054                                |
| Vanuatu                            | 9                                 | 10    | 11              | 0.03             | 0.07   | 124                 | 133   | 143             | 0.47             | 0.97   | 737                                  |
| <b>Central Asia</b>                |                                   |       |                 |                  |        |                     |       |                 |                  |        |                                      |
| Kazakhstan                         | 4,179                             | 4,444 | 4,723           | 13.24            | 27.21  | 161                 | 171   | 182             | 0.51             | 1.05   | 260,033                              |
| Kyrgyzstan                         | 184                               | 204   | 225             | 1.00             | 2.05   | 102                 | 113   | 125             | 0.56             | 1.14   | 17,953                               |
| Mongolia                           | 235                               | 253   | 273             | 0.92             | 1.90   | 128                 | 139   | 149             | 0.50             | 1.04   | 18,281                               |
| Tajikistan                         | 76                                | 88    | 100             | 0.58             | 1.20   | 74                  | 86    | 98              | 0.57             | 1.17   | 10,223                               |
| Uzbekistan                         | 250                               | 299   | 352             | 2.47             | 5.09   | 59                  | 71    | 84              | 0.59             | 1.21   | 42,089                               |
| <b>Central America</b>             |                                   |       |                 |                  |        |                     |       |                 |                  |        |                                      |
| Belize                             | 11                                | 13    | 14              | 0.08             | 0.16   | 81                  | 92    | 103             | 0.55             | 1.13   | 1,397                                |
| Costa Rica                         | 40                                | 45    | 49              | 0.22             | 0.45   | 94                  | 104   | 115             | 0.51             | 1.05   | 4,269                                |
| Cuba                               | 383                               | 429   | 478             | 2.29             | 4.71   | 89                  | 99    | 110             | 0.53             | 1.09   | 43,258                               |
| Dominican Republic                 | 102                               | 114   | 127             | 0.60             | 1.23   | 95                  | 107   | 118             | 0.56             | 1.15   | 10,708                               |
| El Salvador                        | 48                                | 56    | 65              | 0.41             | 0.83   | 62                  | 72    | 83              | 0.52             | 1.07   | 7,823                                |
| Guatemala                          | 181                               | 201   | 223             | 1.03             | 2.11   | 89                  | 99    | 110             | 0.51             | 1.04   | 20,205                               |
| Haiti                              | 75                                | 84    | 94              | 0.47             | 0.97   | 88                  | 99    | 111             | 0.56             | 1.14   | 8,484                                |
| Honduras                           | 120                               | 134   | 149             | 0.70             | 1.44   | 90                  | 101   | 112             | 0.53             | 1.08   | 13,283                               |
| Jamaica                            | 20                                | 22    | 24              | 0.09             | 0.19   | 118                 | 129   | 140             | 0.54             | 1.10   | 1,684                                |
| Nicaragua                          | 162                               | 184   | 206             | 1.07             | 2.20   | 79                  | 90    | 101             | 0.52             | 1.08   | 20,451                               |
| Panama                             | 65                                | 72    | 80              | 0.37             | 0.76   | 93                  | 104   | 115             | 0.53             | 1.09   | 6,962                                |
| Puerto Rico                        | 7                                 | 8     | 9               | 0.04             | 0.08   | 105                 | 117   | 129             | 0.57             | 1.18   | 712                                  |
| <b>East Asia</b>                   |                                   |       |                 |                  |        |                     |       |                 |                  |        |                                      |
| China                              | 8,408                             | 9,717 | 11,098          | 65.42            | 134.48 | 70                  | 81    | 93              | 0.55             | 1.12   | 1,197,627                            |
| Japan                              | 452                               | 486   | 521             | 1.67             | 3.43   | 137                 | 147   | 158             | 0.51             | 1.04   | 32,983                               |
| North Korea                        | 169                               | 187   | 207             | 0.92             | 1.89   | 97                  | 107   | 118             | 0.53             | 1.08   | 17,446                               |
| South Korea                        | 106                               | 120   | 134             | 0.70             | 1.44   | 82                  | 92    | 104             | 0.54             | 1.11   | 12,942                               |
| Taiwan                             | 10                                | 11    | 12              | 0.06             | 0.13   | 87                  | 99    | 111             | 0.59             | 1.20   | 1,103                                |
| <b>Eastern and Southern Africa</b> |                                   |       |                 |                  |        |                     |       |                 |                  |        |                                      |
| Angola                             | 147                               | 184   | 222             | 1.81             | 3.72   | 47                  | 58    | 71              | 0.58             | 1.19   | 31,399                               |
| Botswana                           | 7                                 | 10    | 14              | 0.18             | 0.37   | 24                  | 37    | 50              | 0.63             | 1.30   | 2,829                                |
| Burundi                            | 125                               | 138   | 151             | 0.65             | 1.33   | 100                 | 111   | 122             | 0.52             | 1.07   | 12,441                               |
| Eritrea                            | 14                                | 24    | 34              | 0.47             | 0.96   | 18                  | 30    | 42              | 0.59             | 1.21   | 7,954                                |
| Ethiopia                           | 1,268                             | 1,533 | 1,812           | 13.22            | 27.17  | 47                  | 57    | 68              | 0.49             | 1.02   | 267,329                              |
| Kenya                              | 414                               | 468   | 525             | 2.70             | 5.55   | 79                  | 89    | 100             | 0.51             | 1.05   | 52,702                               |
| Lesotho                            | 32                                | 38    | 44              | 0.30             | 0.62   | 59                  | 70    | 82              | 0.56             | 1.15   | 5,402                                |
| Madagascar                         | 265                               | 294   | 324             | 1.42             | 2.92   | 92                  | 102   | 113             | 0.49             | 1.02   | 28,732                               |
| Malawi                             | 203                               | 256   | 311             | 2.63             | 5.40   | 44                  | 55    | 67              | 0.57             | 1.17   | 46,307                               |
| Mozambique                         | 238                               | 291   | 348             | 2.68             | 5.50   | 50                  | 62    | 73              | 0.57             | 1.16   | 47,315                               |
| Namibia                            | 12                                | 19    | 26              | 0.34             | 0.70   | 22                  | 34    | 47              | 0.62             | 1.27   | 5,488                                |
| Rwanda                             | 153                               | 167   | 182             | 0.70             | 1.43   | 112                 | 122   | 133             | 0.51             | 1.04   | 13,723                               |
| Somalia                            | 118                               | 148   | 180             | 1.50             | 3.09   | 46                  | 58    | 70              | 0.59             | 1.21   | 25,621                               |
| South Africa                       | 817                               | 999   | 1,191           | 9.09             | 18.69  | 51                  | 63    | 75              | 0.57             | 1.17   | 159,545                              |
| Tanzania                           | 726                               | 891   | 1,065           | 8.25             | 16.95  | 50                  | 62    | 74              | 0.57             | 1.17   | 144,322                              |
| Uganda                             | 590                               | 655   | 723             | 3.24             | 6.66   | 95                  | 106   | 117             | 0.52             | 1.08   | 61,810                               |
| Zambia                             | 143                               | 177   | 213             | 1.71             | 3.51   | 49                  | 61    | 73              | 0.59             | 1.21   | 29,111                               |
| Zimbabwe                           | 143                               | 177   | 213             | 1.71             | 3.51   | 49                  | 61    | 73              | 0.59             | 1.21   | 29,111                               |

**Table S2: (Cont.): National Analysis of SOC on Available Cropland Soils:** Soil organic carbon (SOC) for all available cropland soils by country (i.e. those not excluded from the analysis as high SOC soils or sandy soils), showing the regional totals and averages, at current status ( $T_0$ ) and after 20 years ( $T_{20}$ ), for the medium and high sequestration scenarios, and their annual increment.

| Available Soils<br>Region | Total Soil Organic Carbon         |                 |               | Annual Increment |        | Average per Hectare |                 |               | Annual Increment |      | Agricultural<br>Area<br>(km <sup>2</sup> ) |
|---------------------------|-----------------------------------|-----------------|---------------|------------------|--------|---------------------|-----------------|---------------|------------------|------|--------------------------------------------|
|                           | $T_0$                             | Medium $T_{20}$ | High $T_{20}$ | Medium           | High   | $T_0$               | Medium $T_{20}$ | High $T_{20}$ | Medium           | High |                                            |
| Country                   | Megatons (t C * 10 <sup>6</sup> ) |                 |               |                  |        | tC/ha               |                 |               |                  |      |                                            |
| <b>Eurasia (Russia)</b>   |                                   |                 |               |                  |        |                     |                 |               |                  |      |                                            |
| Russia                    | 21,943                            | 23,195          | 24,516        | 62.59            | 128.65 | 174                 | 184             | 194           | 0.50             | 1.02 | 1,260,811                                  |
| <b>Europe</b>             |                                   |                 |               |                  |        |                     |                 |               |                  |      |                                            |
| Albania                   | 62                                | 69              | 77            | 0.37             | 0.77   | 99                  | 111             | 124           | 0.60             | 1.23 | 6,206                                      |
| Austria                   | 199                               | 221             | 244           | 1.08             | 2.23   | 99                  | 110             | 121           | 0.54             | 1.11 | 20,127                                     |
| Belarus                   | 927                               | 985             | 1,045         | 2.86             | 5.87   | 171                 | 181             | 193           | 0.53             | 1.08 | 54,268                                     |
| Belgium                   | 87                                | 101             | 116           | 0.70             | 1.43   | 66                  | 76              | 87            | 0.52             | 1.08 | 13,261                                     |
| Bosnia and Herzegovina    | 152                               | 168             | 185           | 0.81             | 1.66   | 107                 | 118             | 130           | 0.57             | 1.16 | 14,225                                     |
| Bulgaria                  | 484                               | 549             | 617           | 3.22             | 6.62   | 88                  | 100             | 112           | 0.59             | 1.20 | 55,037                                     |
| Croatia                   | 176                               | 197             | 221           | 1.10             | 2.25   | 92                  | 104             | 116           | 0.58             | 1.18 | 19,038                                     |
| Czech Republic            | 351                               | 391             | 433           | 2.00             | 4.11   | 94                  | 105             | 116           | 0.54             | 1.10 | 37,234                                     |
| Denmark                   | 376                               | 400             | 425           | 1.19             | 2.45   | 163                 | 174             | 185           | 0.52             | 1.06 | 22,989                                     |
| Estonia                   | 197                               | 207             | 217           | 0.49             | 1.01   | 210                 | 221             | 232           | 0.53             | 1.08 | 9,372                                      |
| Finland                   | 488                               | 506             | 524           | 0.88             | 1.81   | 257                 | 266             | 276           | 0.46             | 0.95 | 18,996                                     |
| France                    | 1,841                             | 2,100           | 2,373         | 12.94            | 26.58  | 79                  | 90              | 102           | 0.56             | 1.14 | 232,344                                    |
| Germany                   | 1,824                             | 1,997           | 2,180         | 8.66             | 17.80  | 112                 | 123             | 134           | 0.53             | 1.09 | 162,640                                    |
| Greece                    | 215                               | 246             | 280           | 1.59             | 3.26   | 80                  | 92              | 105           | 0.59             | 1.22 | 26,793                                     |
| Hungary                   | 410                               | 471             | 535           | 3.03             | 6.24   | 75                  | 86              | 98            | 0.56             | 1.14 | 54,528                                     |
| Ireland                   | 150                               | 156             | 163           | 0.33             | 0.68   | 208                 | 217             | 227           | 0.46             | 0.94 | 7,204                                      |
| Italy                     | 1,103                             | 1,255           | 1,414         | 7.57             | 15.56  | 86                  | 98              | 110           | 0.59             | 1.21 | 128,138                                    |
| Kosovo                    | 31                                | 36              | 40            | 0.21             | 0.43   | 88                  | 99              | 111           | 0.58             | 1.19 | 3,587                                      |
| Latvia                    | 333                               | 350             | 367           | 0.84             | 1.72   | 209                 | 220             | 231           | 0.53             | 1.08 | 15,931                                     |
| Lithuania                 | 614                               | 651             | 691           | 1.87             | 3.85   | 179                 | 190             | 202           | 0.55             | 1.13 | 34,204                                     |
| Luxembourg                | 11                                | 12              | 13            | 0.04             | 0.09   | 126                 | 136             | 147           | 0.50             | 1.04 | 854                                        |
| Macedonia                 | 47                                | 54              | 62            | 0.38             | 0.78   | 72                  | 83              | 96            | 0.58             | 1.20 | 6,501                                      |
| Moldova                   | 204                               | 226             | 250           | 1.11             | 2.29   | 97                  | 108             | 119           | 0.53             | 1.09 | 20,978                                     |
| Montenegro                | 24                                | 26              | 28            | 0.08             | 0.17   | 150                 | 161             | 172           | 0.52             | 1.06 | 1,624                                      |
| Netherlands               | 152                               | 163             | 174           | 0.53             | 1.10   | 141                 | 151             | 161           | 0.49             | 1.01 | 10,793                                     |
| Norway                    | 71                                | 74              | 77            | 0.15             | 0.31   | 216                 | 225             | 235           | 0.47             | 0.96 | 3,273                                      |
| Poland                    | 1,762                             | 1,937           | 2,121         | 8.75             | 17.99  | 110                 | 121             | 132           | 0.55             | 1.12 | 160,230                                    |
| Portugal                  | 321                               | 366             | 413           | 2.25             | 4.63   | 86                  | 98              | 111           | 0.61             | 1.25 | 37,153                                     |
| Romania                   | 937                               | 1,053           | 1,175         | 5.79             | 11.90  | 90                  | 102             | 113           | 0.56             | 1.15 | 103,550                                    |
| Serbia                    | 360                               | 408             | 459           | 2.40             | 4.93   | 86                  | 97              | 109           | 0.57             | 1.17 | 42,015                                     |
| Slovakia                  | 163                               | 182             | 201           | 0.91             | 1.87   | 96                  | 107             | 118           | 0.54             | 1.10 | 16,991                                     |
| Slovenia                  | 65                                | 70              | 76            | 0.27             | 0.55   | 129                 | 140             | 151           | 0.54             | 1.10 | 5,002                                      |
| Spain                     | 1,371                             | 1,650           | 1,943         | 13.93            | 28.62  | 60                  | 72              | 85            | 0.61             | 1.25 | 229,705                                    |
| Sweden                    | 523                               | 549             | 577           | 1.33             | 2.73   | 195                 | 205             | 216           | 0.50             | 1.02 | 26,772                                     |
| Switzerland               | 129                               | 139             | 148           | 0.47             | 0.96   | 141                 | 151             | 162           | 0.51             | 1.05 | 9,164                                      |
| Ukraine                   | 4,159                             | 4,505           | 4,870         | 17.29            | 35.53  | 129                 | 139             | 151           | 0.53             | 1.10 | 323,202                                    |
| United Kingdom            | 732                               | 793             | 858           | 3.07             | 6.30   | 119                 | 129             | 140           | 0.50             | 1.03 | 61,457                                     |
| <b>North Africa</b>       |                                   |                 |               |                  |        |                     |                 |               |                  |      |                                            |
| Algeria                   | 410                               | 499             | 592           | 4.41             | 9.07   | 57                  | 70              | 83            | 0.62             | 1.27 | 71,538                                     |
| Egypt                     | 408                               | 457             | 508           | 2.42             | 4.98   | 105                 | 118             | 131           | 0.62             | 1.28 | 38,877                                     |
| Libya                     | 66                                | 92              | 120           | 1.30             | 2.68   | 32                  | 44              | 57            | 0.62             | 1.28 | 20,867                                     |
| Mauritania                | 6                                 | 9               | 13            | 0.18             | 0.36   | 20                  | 32              | 45            | 0.62             | 1.27 | 2,857                                      |
| Morocco                   | 440                               | 543             | 651           | 5.13             | 10.54  | 54                  | 67              | 80            | 0.63             | 1.29 | 81,494                                     |
| Tunisia                   | 177                               | 232             | 289           | 2.72             | 5.59   | 41                  | 54              | 67            | 0.63             | 1.30 | 42,966                                     |
| <b>North America</b>      |                                   |                 |               |                  |        |                     |                 |               |                  |      |                                            |
| Canada                    | 6,987                             | 7,522           | 8,087         | 26.78            | 55.01  | 138                 | 149             | 160           | 0.53             | 1.09 | 506,178                                    |
| Mexico                    | 2,137                             | 2,559           | 3,004         | 21.10            | 43.35  | 57                  | 68              | 80            | 0.56             | 1.15 | 377,829                                    |
| United States             | 18,948                            | 21,442          | 24,071        | 124.66           | 256.14 | 94                  | 107             | 120           | 0.62             | 1.27 | 2,009,930                                  |

**Table S2: (Cont.): National Analysis of SOC on Available Cropland Soils:** Soil organic carbon (SOC) for all available cropland soils by country (i.e. those not excluded from the analysis as high SOC or sandy soils), showing the regional totals and averages, at current status ( $T_0$ ) and after 20 years ( $T_{20}$ ), for the medium and high sequestration scenarios, and their annual increment.

| Available Soils<br>Region      | Total Soil Organic Carbon         |                 |               | Annual Increment |        | Average per Hectare |                 |               | Annual Increment |      | Agricultural<br>Area<br>(km <sup>2</sup> ) |
|--------------------------------|-----------------------------------|-----------------|---------------|------------------|--------|---------------------|-----------------|---------------|------------------|------|--------------------------------------------|
|                                | $T_0$                             | Medium $T_{20}$ | High $T_{20}$ | Medium           | High   | $T_0$               | Medium $T_{20}$ | High $T_{20}$ | Medium           | High |                                            |
| Country                        | Megatons (t C * 10 <sup>6</sup> ) |                 |               |                  |        | tC/ha               |                 |               |                  |      |                                            |
| <b>South America</b>           |                                   |                 |               |                  |        |                     |                 |               |                  |      |                                            |
| Argentina                      | 2,199                             | 2,523           | 2,865         | 16.20            | 33.29  | 70                  | 81              | 92            | 0.52             | 1.07 | 312,239                                    |
| Bolivia                        | 266                               | 307             | 350           | 2.03             | 4.18   | 72                  | 83              | 95            | 0.55             | 1.13 | 36,986                                     |
| Brazil                         | 5,063                             | 5,781           | 6,539         | 35.88            | 73.79  | 75                  | 85              | 96            | 0.53             | 1.09 | 679,540                                    |
| Chile                          | 135                               | 147             | 159           | 0.58             | 1.19   | 114                 | 124             | 134           | 0.49             | 1.01 | 11,843                                     |
| Colombia                       | 301                               | 333             | 366           | 1.57             | 3.23   | 99                  | 110             | 120           | 0.52             | 1.06 | 30,359                                     |
| Ecuador                        | 198                               | 214             | 232           | 0.83             | 1.70   | 111                 | 120             | 130           | 0.46             | 0.95 | 17,842                                     |
| French Guiana                  | 1                                 | 1               | 2             | 0.01             | 0.01   | 90                  | 100             | 110           | 0.49             | 1.00 | 147                                        |
| Guyana                         | 41                                | 45              | 50            | 0.22             | 0.46   | 98                  | 108             | 119           | 0.53             | 1.09 | 4,181                                      |
| Paraguay                       | 335                               | 376             | 421           | 2.09             | 4.30   | 85                  | 96              | 107           | 0.53             | 1.09 | 39,385                                     |
| Peru                           | 328                               | 365             | 404           | 1.86             | 3.83   | 88                  | 98              | 109           | 0.50             | 1.03 | 37,083                                     |
| Suriname                       | 6                                 | 7               | 7             | 0.03             | 0.06   | 116                 | 126             | 137           | 0.53             | 1.08 | 533                                        |
| Uruguay                        | 331                               | 371             | 413           | 2.00             | 4.10   | 95                  | 106             | 118           | 0.57             | 1.17 | 35,027                                     |
| Venezuela                      | 211                               | 245             | 280           | 1.68             | 3.45   | 70                  | 81              | 93            | 0.55             | 1.14 | 30,289                                     |
| <b>South Asia</b>              |                                   |                 |               |                  |        |                     |                 |               |                  |      |                                            |
| Bangladesh                     | 693                               | 748             | 807           | 2.78             | 5.71   | 132                 | 142             | 154           | 0.53             | 1.09 | 52,551                                     |
| Bhutan                         | 33                                | 35              | 37            | 0.11             | 0.22   | 148                 | 158             | 168           | 0.49             | 1.00 | 2,204                                      |
| India                          | 6,433                             | 8,509           | 10,699        | 103.80           | 213.30 | 39                  | 52              | 65            | 0.63             | 1.29 | 1,647,998                                  |
| Nepal                          | 326                               | 361             | 397           | 1.73             | 3.55   | 100                 | 111             | 122           | 0.53             | 1.09 | 32,560                                     |
| Sri Lanka                      | 197                               | 216             | 237           | 0.96             | 1.97   | 111                 | 122             | 133           | 0.54             | 1.11 | 17,740                                     |
| <b>SouthEast Asia</b>          |                                   |                 |               |                  |        |                     |                 |               |                  |      |                                            |
| Cambodia                       | 408                               | 462             | 520           | 2.74             | 5.62   | 87                  | 99              | 111           | 0.59             | 1.20 | 46,691                                     |
| East Timor                     | 38                                | 43              | 48            | 0.24             | 0.50   | 80                  | 90              | 101           | 0.51             | 1.06 | 4,734                                      |
| Indonesia                      | 2,441                             | 2,614           | 2,800         | 8.67             | 17.97  | 128                 | 137             | 147           | 0.46             | 0.94 | 190,249                                    |
| Laos                           | 111                               | 128             | 145           | 0.81             | 1.66   | 75                  | 86              | 97            | 0.54             | 1.12 | 14,834                                     |
| Malaysia                       | 632                               | 677             | 724           | 2.23             | 4.58   | 135                 | 145             | 155           | 0.48             | 0.98 | 46,673                                     |
| Myanmar                        | 870                               | 988             | 1,112         | 5.88             | 12.09  | 83                  | 95              | 106           | 0.56             | 1.16 | 104,439                                    |
| Philippines                    | 851                               | 936             | 1,027         | 4.29             | 8.83   | 104                 | 114             | 125           | 0.52             | 1.08 | 81,878                                     |
| Thailand                       | 1,909                             | 2,236           | 2,580         | 16.31            | 33.51  | 69                  | 80              | 93            | 0.59             | 1.20 | 278,690                                    |
| Vietnam                        | 886                               | 975             | 1,069         | 4.45             | 9.15   | 105                 | 116             | 127           | 0.53             | 1.09 | 84,234                                     |
| <b>West and Central Africa</b> |                                   |                 |               |                  |        |                     |                 |               |                  |      |                                            |
| Benin                          | 80                                | 111             | 143           | 1.53             | 3.14   | 29                  | 41              | 52            | 0.56             | 1.15 | 27,320                                     |
| Burkina Faso                   | 82                                | 144             | 209           | 3.08             | 6.34   | 16                  | 29              | 42            | 0.62             | 1.27 | 49,942                                     |
| Cameroon                       | 327                               | 396             | 469           | 3.45             | 7.10   | 52                  | 63              | 74            | 0.55             | 1.12 | 63,147                                     |
| Central African Republic       | 99                                | 119             | 139           | 0.97             | 2.01   | 54                  | 65              | 76            | 0.54             | 1.10 | 18,207                                     |
| Chad                           | 180                               | 231             | 284           | 2.54             | 5.23   | 43                  | 55              | 68            | 0.61             | 1.25 | 41,782                                     |
| Coate d'Ivoire                 | 330                               | 403             | 479           | 3.62             | 7.44   | 52                  | 63              | 75            | 0.57             | 1.17 | 63,560                                     |
| D. R. Congo                    | 351                               | 391             | 433           | 2.00             | 4.11   | 94                  | 105             | 116           | 0.54             | 1.10 | 37,234                                     |
| Equatorial Guinea              | 21                                | 23              | 25            | 0.10             | 0.20   | 102                 | 112             | 123           | 0.50             | 1.02 | 2,004                                      |
| Gabon                          | 43                                | 47              | 52            | 0.22             | 0.46   | 98                  | 109             | 120           | 0.52             | 1.07 | 4,331                                      |
| Gambia                         | 14                                | 18              | 22            | 0.20             | 0.42   | 42                  | 55              | 68            | 0.63             | 1.30 | 3,229                                      |
| Ghana                          | 289                               | 358             | 432           | 3.48             | 7.15   | 47                  | 58              | 70            | 0.57             | 1.16 | 61,352                                     |
| Guinea                         | 175                               | 210             | 247           | 1.76             | 3.63   | 50                  | 60              | 71            | 0.51             | 1.04 | 34,791                                     |
| Guinea-Bissau                  | 35                                | 41              | 47            | 0.29             | 0.60   | 61                  | 72              | 82            | 0.51             | 1.05 | 5,726                                      |
| Liberia                        | 40                                | 47              | 54            | 0.34             | 0.70   | 64                  | 75              | 87            | 0.55             | 1.12 | 6,218                                      |
| Mali                           | 105                               | 173             | 245           | 3.39             | 6.97   | 19                  | 31              | 44            | 0.61             | 1.25 | 55,655                                     |
| Niger                          | 127                               | 202             | 280           | 3.71             | 7.63   | 20                  | 32              | 44            | 0.58             | 1.20 | 63,616                                     |
| Nigeria                        | 894                               | 1,289           | 1,706         | 19.77            | 40.64  | 26                  | 37              | 49            | 0.57             | 1.16 | 349,174                                    |
| Republic of Congo              | 43                                | 48              | 54            | 0.26             | 0.54   | 86                  | 97              | 108           | 0.53             | 1.10 | 4,952                                      |
| Senegal                        | 137                               | 186             | 238           | 2.45             | 5.03   | 35                  | 47              | 60            | 0.62             | 1.27 | 39,540                                     |
| Sierra Leone                   | 98                                | 114             | 131           | 0.80             | 1.64   | 64                  | 75              | 86            | 0.52             | 1.08 | 15,243                                     |
| South Sudan                    | 145                               | 176             | 208           | 1.52             | 3.12   | 53                  | 64              | 76            | 0.55             | 1.14 | 27,450                                     |
| Sudan                          | 550                               | 850             | 1,166         | 14.97            | 30.77  | 24                  | 36              | 50            | 0.64             | 1.32 | 233,104                                    |
| Togo                           | 76                                | 100             | 124           | 1.18             | 2.42   | 35                  | 46              | 58            | 0.55             | 1.13 | 21,451                                     |

**Table S2: (Cont.): National Analysis of SOC on Available Cropland Soils:** Soil organic carbon (SOC) for all available cropland soils by country (i.e. those not excluded from the analysis as high SOC or sandy soils), showing the regional totals and averages, at current status ( $T_0$ ) and after 20 years ( $T_{20}$ ), for the medium and high sequestration scenarios, and their annual increment.

| Available Soils     | Total Soil Organic Carbon         |                 |               | Annual Increment |       | Average per Hectare |                 |               | Annual Increment |      | Agricultural Area (km <sup>2</sup> ) |
|---------------------|-----------------------------------|-----------------|---------------|------------------|-------|---------------------|-----------------|---------------|------------------|------|--------------------------------------|
| Region              | $T_0$                             | Medium $T_{20}$ | High $T_{20}$ | Medium           | High  | $T_0$               | Medium $T_{20}$ | High $T_{20}$ | Medium           | High |                                      |
| Country             | Megatons (t C * 10 <sup>6</sup> ) |                 |               |                  |       | tC/ha               |                 |               |                  |      |                                      |
| <b>Western Asia</b> |                                   |                 |               |                  |       |                     |                 |               |                  |      |                                      |
| Afghanistan         | 316                               | 406             | 502           | 4.54             | 9.32  | 41                  | 52              | 65            | 0.58             | 1.20 | 77,562                               |
| Armenia             | 55                                | 61              | 67            | 0.27             | 0.56  | 109                 | 120             | 131           | 0.54             | 1.10 | 5,092                                |
| Azerbaijan          | 175                               | 197             | 221           | 1.12             | 2.30  | 89                  | 100             | 112           | 0.57             | 1.17 | 19,661                               |
| Cyprus              | 12                                | 15              | 18            | 0.15             | 0.32  | 50                  | 63              | 76            | 0.64             | 1.31 | 2,421                                |
| Georgia             | 68                                | 74              | 81            | 0.32             | 0.65  | 116                 | 127             | 139           | 0.54             | 1.11 | 5,831                                |
| Iran                | 479                               | 645             | 819           | 8.27             | 17.00 | 34                  | 46              | 58            | 0.59             | 1.21 | 140,542                              |
| Iraq                | 239                               | 324             | 414           | 4.26             | 8.75  | 34                  | 47              | 60            | 0.61             | 1.26 | 69,555                               |
| Israel              | 21                                | 26              | 31            | 0.25             | 0.51  | 53                  | 66              | 79            | 0.63             | 1.30 | 3,952                                |
| Jordan              | 12                                | 17              | 21            | 0.22             | 0.45  | 34                  | 46              | 59            | 0.61             | 1.26 | 3,592                                |
| Lebanon             | 19                                | 22              | 26            | 0.18             | 0.36  | 66                  | 78              | 91            | 0.62             | 1.27 | 2,838                                |
| Pakistan            | 832                               | 1,087           | 1,357         | 12.77            | 26.23 | 41                  | 53              | 66            | 0.62             | 1.28 | 205,228                              |
| Palestine           | 4                                 | 5               | 6             | 0.04             | 0.08  | 61                  | 74              | 87            | 0.63             | 1.30 | 643                                  |
| Saudi Arabia        | 42                                | 64              | 87            | 1.10             | 2.27  | 23                  | 35              | 48            | 0.61             | 1.26 | 18,053                               |
| Syria               | 203                               | 263             | 326           | 2.99             | 6.14  | 42                  | 54              | 67            | 0.61             | 1.26 | 48,738                               |
| Turkey              | 1,855                             | 2,178           | 2,519         | 16.15            | 33.19 | 67                  | 79              | 91            | 0.59             | 1.20 | 275,553                              |
| Turkmenistan        | 90                                | 115             | 141           | 1.23             | 2.53  | 44                  | 56              | 69            | 0.60             | 1.23 | 20,479                               |
| Yemen               | 25                                | 36              | 49            | 0.58             | 1.19  | 26                  | 39              | 51            | 0.61             | 1.26 | 9,461                                |

Table S3: Top fifty countries with the highest total SOC on croplands, currently.

Sorted by T0 - Total Soil Organic Carbon Currently

|    | Country        | Total Soil Organic Carbon |            |          | Annual Increment |        | Average per Hectare |            |          | Annual Increment |      | Agricultural Area (km2) |
|----|----------------|---------------------------|------------|----------|------------------|--------|---------------------|------------|----------|------------------|------|-------------------------|
|    |                | T0                        | Medium T20 | High T20 | Medium           | High   | T0                  | Medium T20 | High T20 | Medium           | High |                         |
|    |                | Megatons ( t C * 106)     |            |          |                  |        | tC/ha               |            |          |                  |      |                         |
| 1  | Russia         | 21,943                    | 23,195     | 24,516   | 62.59            | 128.65 | 174                 | 184        | 194      | 0.50             | 1.02 | 1,260,811               |
| 2  | United States  | 18,948                    | 21,442     | 24,071   | 124.66           | 256.14 | 94                  | 107        | 120      | 0.62             | 1.27 | 2,009,930               |
| 3  | China          | 8,408                     | 9,717      | 11,098   | 65.42            | 134.48 | 70                  | 81         | 93       | 0.55             | 1.12 | 1,197,627               |
| 4  | Canada         | 6,987                     | 7,522      | 8,087    | 26.78            | 55.01  | 138                 | 149        | 160      | 0.53             | 1.09 | 506,178                 |
| 5  | India          | 6,433                     | 8,509      | 10,699   | 103.80           | 213.30 | 39                  | 52         | 65       | 0.63             | 1.29 | 1,647,998               |
| 6  | Brazil         | 5,063                     | 5,781      | 6,539    | 35.88            | 73.79  | 75                  | 85         | 96       | 0.53             | 1.09 | 679,540                 |
| 7  | Kazakhstan     | 4,179                     | 4,444      | 4,723    | 13.24            | 27.21  | 161                 | 171        | 182      | 0.51             | 1.05 | 260,033                 |
| 8  | Ukraine        | 4,159                     | 4,505      | 4,870    | 17.29            | 35.53  | 129                 | 139        | 151      | 0.53             | 1.10 | 323,202                 |
| 9  | Australia      | 3,418                     | 4,143      | 4,907    | 36.23            | 74.46  | 54                  | 65         | 77       | 0.57             | 1.17 | 634,882                 |
| 10 | Indonesia      | 2,441                     | 2,614      | 2,800    | 8.67             | 17.97  | 128                 | 137        | 147      | 0.46             | 0.94 | 190,249                 |
| 11 | Argentina      | 2,199                     | 2,523      | 2,865    | 16.20            | 33.29  | 70                  | 81         | 92       | 0.52             | 1.07 | 312,239                 |
| 12 | Mexico         | 2,137                     | 2,559      | 3,004    | 21.10            | 43.35  | 57                  | 68         | 80       | 0.56             | 1.15 | 377,829                 |
| 13 | Thailand       | 1,909                     | 2,236      | 2,580    | 16.31            | 33.51  | 69                  | 80         | 93       | 0.59             | 1.20 | 278,690                 |
| 14 | Turkey         | 1,855                     | 2,178      | 2,519    | 16.15            | 33.19  | 67                  | 79         | 91       | 0.59             | 1.20 | 275,553                 |
| 15 | France         | 1,841                     | 2,100      | 2,373    | 12.94            | 26.58  | 79                  | 90         | 102      | 0.56             | 1.14 | 232,344                 |
| 16 | Germany        | 1,824                     | 1,997      | 2,180    | 8.66             | 17.80  | 112                 | 123        | 134      | 0.53             | 1.09 | 162,640                 |
| 17 | Poland         | 1,762                     | 1,937      | 2,121    | 8.75             | 17.99  | 110                 | 121        | 132      | 0.55             | 1.12 | 160,230                 |
| 18 | Spain          | 1,371                     | 1,650      | 1,943    | 13.93            | 28.62  | 60                  | 72         | 85       | 0.61             | 1.25 | 229,705                 |
| 19 | Ethiopia       | 1,268                     | 1,533      | 1,812    | 13.22            | 27.17  | 47                  | 57         | 68       | 0.49             | 1.02 | 267,329                 |
| 20 | Italy          | 1,103                     | 1,255      | 1,414    | 7.57             | 15.56  | 86                  | 98         | 110      | 0.59             | 1.21 | 128,138                 |
| 21 | Romania        | 937                       | 1,053      | 1,175    | 5.79             | 11.90  | 90                  | 102        | 113      | 0.56             | 1.15 | 103,550                 |
| 22 | Belarus        | 927                       | 985        | 1,045    | 2.86             | 5.87   | 171                 | 181        | 193      | 0.53             | 1.08 | 54,268                  |
| 23 | Nigeria        | 894                       | 1,289      | 1,706    | 19.77            | 40.64  | 26                  | 37         | 49       | 0.57             | 1.16 | 349,174                 |
| 24 | Vietnam        | 886                       | 975        | 1,069    | 4.45             | 9.15   | 105                 | 116        | 127      | 0.53             | 1.09 | 84,234                  |
| 25 | Myanmar        | 870                       | 988        | 1,112    | 5.88             | 12.09  | 83                  | 95         | 106      | 0.56             | 1.16 | 104,439                 |
| 26 | Philippines    | 851                       | 936        | 1,027    | 4.29             | 8.83   | 104                 | 114        | 125      | 0.52             | 1.08 | 81,878                  |
| 27 | Pakistan       | 832                       | 1,087      | 1,357    | 12.77            | 26.23  | 41                  | 53         | 66       | 0.62             | 1.28 | 205,228                 |
| 28 | South Africa   | 817                       | 999        | 1,191    | 9.09             | 18.69  | 51                  | 63         | 75       | 0.57             | 1.17 | 159,545                 |
| 29 | United Kingdom | 732                       | 793        | 858      | 3.07             | 6.30   | 119                 | 129        | 140      | 0.50             | 1.03 | 61,457                  |
| 30 | Tanzania       | 726                       | 891        | 1,065    | 8.25             | 16.95  | 50                  | 62         | 74       | 0.57             | 1.17 | 144,322                 |
| 31 | Bangladesh     | 693                       | 748        | 807      | 2.78             | 5.71   | 132                 | 142        | 154      | 0.53             | 1.09 | 52,551                  |
| 32 | Malaysia       | 632                       | 677        | 724      | 2.23             | 4.58   | 135                 | 145        | 155      | 0.48             | 0.98 | 46,673                  |
| 33 | Lithuania      | 614                       | 651        | 691      | 1.87             | 3.85   | 179                 | 190        | 202      | 0.55             | 1.13 | 34,204                  |
| 34 | Uganda         | 590                       | 655        | 723      | 3.24             | 6.66   | 95                  | 106        | 117      | 0.52             | 1.08 | 61,810                  |
| 35 | Sudan          | 550                       | 850        | 1,166    | 14.97            | 30.77  | 24                  | 36         | 50       | 0.64             | 1.32 | 233,104                 |
| 36 | Sweden         | 523                       | 549        | 577      | 1.33             | 2.73   | 195                 | 205        | 216      | 0.50             | 1.02 | 26,772                  |
| 37 | Finland        | 488                       | 506        | 524      | 0.88             | 1.81   | 257                 | 266        | 276      | 0.46             | 0.95 | 18,996                  |
| 38 | Bulgaria       | 484                       | 549        | 617      | 3.22             | 6.62   | 88                  | 100        | 112      | 0.59             | 1.20 | 55,037                  |
| 39 | Iran           | 479                       | 645        | 819      | 8.27             | 17.00  | 34                  | 46         | 58       | 0.59             | 1.21 | 140,542                 |
| 40 | Japan          | 452                       | 486        | 521      | 1.67             | 3.43   | 137                 | 147        | 158      | 0.51             | 1.04 | 32,983                  |
| 41 | Morocco        | 440                       | 543        | 651      | 5.13             | 10.54  | 54                  | 67         | 80       | 0.63             | 1.29 | 81,494                  |
| 42 | Kenya          | 414                       | 468        | 525      | 2.70             | 5.55   | 79                  | 89         | 100      | 0.51             | 1.05 | 52,702                  |
| 43 | Algeria        | 410                       | 499        | 592      | 4.41             | 9.07   | 57                  | 70         | 83       | 0.62             | 1.27 | 71,538                  |
| 44 | Hungary        | 410                       | 471        | 535      | 3.03             | 6.24   | 75                  | 86         | 98       | 0.56             | 1.14 | 54,528                  |
| 45 | Egypt          | 408                       | 457        | 508      | 2.42             | 4.98   | 105                 | 118        | 131      | 0.62             | 1.28 | 38,877                  |
| 46 | Cambodia       | 408                       | 462        | 520      | 2.74             | 5.62   | 87                  | 99         | 111      | 0.59             | 1.20 | 46,691                  |
| 47 | Cuba           | 383                       | 429        | 478      | 2.29             | 4.71   | 89                  | 99         | 110      | 0.53             | 1.09 | 43,258                  |
| 48 | Denmark        | 376                       | 400        | 425      | 1.19             | 2.45   | 163                 | 174        | 185      | 0.52             | 1.06 | 22,989                  |
| 49 | Serbia         | 360                       | 408        | 459      | 2.40             | 4.93   | 86                  | 97         | 109      | 0.57             | 1.17 | 42,015                  |
| 50 | Czech Republic | 351                       | 391        | 433      | 2.00             | 4.11   | 94                  | 105        | 116      | 0.54             | 1.10 | 37,234                  |

Table S4: Top fifty countries with the highest total annual increment of SOC increase.

| Country        | Total Soil Organic Carbon          |            |          | Annual Increment |        | Average per Hectare |            |          | Annual Increment |      | Agricultural Area (km <sup>2</sup> ) |
|----------------|------------------------------------|------------|----------|------------------|--------|---------------------|------------|----------|------------------|------|--------------------------------------|
|                | T0                                 | Medium T20 | High T20 | Medium           | High   | T0                  | Medium T20 | High T20 | Medium           | High |                                      |
|                | Megatons ( t C * 10 <sup>6</sup> ) |            |          |                  |        | tC/ha               |            |          |                  |      |                                      |
| United States  | 18,948                             | 21,442     | 24,071   | 124.66           | 256.14 | 94                  | 107        | 120      | 0.62             | 1.27 | 2,009,930                            |
| India          | 6,433                              | 8,509      | 10,699   | 103.80           | 213.30 | 39                  | 52         | 65       | 0.63             | 1.29 | 1,647,998                            |
| China          | 8,408                              | 9,717      | 11,098   | 65.42            | 134.48 | 70                  | 81         | 93       | 0.55             | 1.12 | 1,197,627                            |
| Russia         | 21,943                             | 23,195     | 24,516   | 62.59            | 128.65 | 174                 | 184        | 194      | 0.50             | 1.02 | 1,260,811                            |
| Australia      | 3,418                              | 4,143      | 4,907    | 36.23            | 74.46  | 54                  | 65         | 77       | 0.57             | 1.17 | 634,882                              |
| Brazil         | 5,063                              | 5,781      | 6,539    | 35.88            | 73.79  | 75                  | 85         | 96       | 0.53             | 1.09 | 679,540                              |
| Canada         | 6,987                              | 7,522      | 8,087    | 26.78            | 55.01  | 138                 | 149        | 160      | 0.53             | 1.09 | 506,178                              |
| Mexico         | 2,137                              | 2,559      | 3,004    | 21.10            | 43.35  | 57                  | 68         | 80       | 0.56             | 1.15 | 377,829                              |
| Nigeria        | 894                                | 1,289      | 1,706    | 19.77            | 40.64  | 26                  | 37         | 49       | 0.57             | 1.16 | 349,174                              |
| Ukraine        | 4,159                              | 4,505      | 4,870    | 17.29            | 35.53  | 129                 | 139        | 151      | 0.53             | 1.10 | 323,202                              |
| Thailand       | 1,909                              | 2,236      | 2,580    | 16.31            | 33.51  | 69                  | 80         | 93       | 0.59             | 1.20 | 278,690                              |
| Argentina      | 2,199                              | 2,523      | 2,865    | 16.20            | 33.29  | 70                  | 81         | 92       | 0.52             | 1.07 | 312,239                              |
| Turkey         | 1,855                              | 2,178      | 2,519    | 16.15            | 33.19  | 67                  | 79         | 91       | 0.59             | 1.20 | 275,553                              |
| Sudan          | 550                                | 850        | 1,166    | 14.97            | 30.77  | 24                  | 36         | 50       | 0.64             | 1.32 | 233,104                              |
| Spain          | 1,371                              | 1,650      | 1,943    | 13.93            | 28.62  | 60                  | 72         | 85       | 0.61             | 1.25 | 229,705                              |
| Kazakhstan     | 4,179                              | 4,444      | 4,723    | 13.24            | 27.21  | 161                 | 171        | 182      | 0.51             | 1.05 | 260,033                              |
| Ethiopia       | 1,268                              | 1,533      | 1,812    | 13.22            | 27.17  | 47                  | 57         | 68       | 0.49             | 1.02 | 267,329                              |
| France         | 1,841                              | 2,100      | 2,373    | 12.94            | 26.58  | 79                  | 90         | 102      | 0.56             | 1.14 | 232,344                              |
| Pakistan       | 832                                | 1,087      | 1,357    | 12.77            | 26.23  | 41                  | 53         | 66       | 0.62             | 1.28 | 205,228                              |
| South Africa   | 817                                | 999        | 1,191    | 9.09             | 18.69  | 51                  | 63         | 75       | 0.57             | 1.17 | 159,545                              |
| Poland         | 1,762                              | 1,937      | 2,121    | 8.75             | 17.99  | 110                 | 121        | 132      | 0.55             | 1.12 | 160,230                              |
| Indonesia      | 2,441                              | 2,614      | 2,800    | 8.67             | 17.97  | 128                 | 137        | 147      | 0.46             | 0.94 | 190,249                              |
| Germany        | 1,824                              | 1,997      | 2,180    | 8.66             | 17.80  | 112                 | 123        | 134      | 0.53             | 1.09 | 162,640                              |
| Iran           | 479                                | 645        | 819      | 8.27             | 17.00  | 34                  | 46         | 58       | 0.59             | 1.21 | 140,542                              |
| Tanzania       | 726                                | 891        | 1,065    | 8.25             | 16.95  | 50                  | 62         | 74       | 0.57             | 1.17 | 144,322                              |
| Italy          | 1,103                              | 1,255      | 1,414    | 7.57             | 15.56  | 86                  | 98         | 110      | 0.59             | 1.21 | 128,138                              |
| Myanmar        | 870                                | 988        | 1,112    | 5.88             | 12.09  | 83                  | 95         | 106      | 0.56             | 1.16 | 104,439                              |
| Romania        | 937                                | 1,053      | 1,175    | 5.79             | 11.90  | 90                  | 102        | 113      | 0.56             | 1.15 | 103,550                              |
| Morocco        | 440                                | 543        | 651      | 5.13             | 10.54  | 54                  | 67         | 80       | 0.63             | 1.29 | 81,494                               |
| Afghanistan    | 316                                | 406        | 502      | 4.54             | 9.32   | 41                  | 52         | 65       | 0.58             | 1.20 | 77,562                               |
| Vietnam        | 886                                | 975        | 1,069    | 4.45             | 9.15   | 105                 | 116        | 127      | 0.53             | 1.09 | 84,234                               |
| Algeria        | 410                                | 499        | 592      | 4.41             | 9.07   | 57                  | 70         | 83       | 0.62             | 1.27 | 71,538                               |
| Philippines    | 851                                | 936        | 1,027    | 4.29             | 8.83   | 104                 | 114        | 125      | 0.52             | 1.08 | 81,878                               |
| Iraq           | 239                                | 324        | 414      | 4.26             | 8.75   | 34                  | 47         | 60       | 0.61             | 1.26 | 69,555                               |
| Niger          | 127                                | 202        | 280      | 3.71             | 7.63   | 20                  | 32         | 44       | 0.58             | 1.20 | 63,616                               |
| Coate d'Ivoire | 330                                | 403        | 479      | 3.62             | 7.44   | 52                  | 63         | 75       | 0.57             | 1.17 | 63,560                               |
| Ghana          | 289                                | 358        | 432      | 3.48             | 7.15   | 47                  | 58         | 70       | 0.57             | 1.16 | 61,352                               |
| Cameroon       | 327                                | 396        | 469      | 3.45             | 7.10   | 52                  | 63         | 74       | 0.55             | 1.12 | 63,147                               |
| Mali           | 105                                | 173        | 245      | 3.39             | 6.97   | 19                  | 31         | 44       | 0.61             | 1.25 | 55,655                               |
| Uganda         | 590                                | 655        | 723      | 3.24             | 6.66   | 95                  | 106        | 117      | 0.52             | 1.08 | 61,810                               |
| Bulgaria       | 484                                | 549        | 617      | 3.22             | 6.62   | 88                  | 100        | 112      | 0.59             | 1.20 | 55,037                               |
| Burkina Faso   | 82                                 | 144        | 209      | 3.08             | 6.34   | 16                  | 29         | 42       | 0.62             | 1.27 | 49,942                               |
| United Kingdom | 732                                | 793        | 858      | 3.07             | 6.30   | 119                 | 129        | 140      | 0.50             | 1.03 | 61,457                               |
| Hungary        | 410                                | 471        | 535      | 3.03             | 6.24   | 75                  | 86         | 98       | 0.56             | 1.14 | 54,528                               |
| Syria          | 203                                | 263        | 326      | 2.99             | 6.14   | 42                  | 54         | 67       | 0.61             | 1.26 | 48,738                               |
| Belarus        | 927                                | 985        | 1,045    | 2.86             | 5.87   | 171                 | 181        | 193      | 0.53             | 1.08 | 54,268                               |
| Bangladesh     | 693                                | 748        | 807      | 2.78             | 5.71   | 132                 | 142        | 154      | 0.53             | 1.09 | 52,551                               |
| Cambodia       | 408                                | 462        | 520      | 2.74             | 5.62   | 87                  | 99         | 111      | 0.59             | 1.20 | 46,691                               |
| Tunisia        | 177                                | 232        | 289      | 2.72             | 5.59   | 41                  | 54         | 67       | 0.63             | 1.30 | 42,966                               |
| Kenya          | 414                                | 468        | 525      | 2.70             | 5.55   | 79                  | 89         | 100      | 0.51             | 1.05 | 52,702                               |

Table S5: Top fifty countries with the highest total annual increment of SOC increase per hectare.

| Country       | Total Soil Organic Carbon |            |          | Annual Increment |        | Average per Hectare |            |          | Annual Increment |      | Agricultural Area (km <sup>2</sup> ) |
|---------------|---------------------------|------------|----------|------------------|--------|---------------------|------------|----------|------------------|------|--------------------------------------|
|               | T0                        | Medium T20 | High T20 | Medium           | High   | T0                  | Medium T20 | High T20 | Medium           | High |                                      |
|               | Megatons ( t C * 106)     |            |          |                  |        | tC/ha               |            |          |                  |      |                                      |
| Sudan         | 550                       | 850        | 1,166    | 14.97            | 30.77  | 24                  | 36         | 50       | 0.64             | 1.32 | 233,104                              |
| Cyprus        | 12                        | 15         | 18       | 0.15             | 0.32   | 50                  | 63         | 76       | 0.64             | 1.31 | 2,421                                |
| Botswana      | 7                         | 10         | 14       | 0.18             | 0.37   | 24                  | 37         | 50       | 0.63             | 1.30 | 2,829                                |
| Tunisia       | 177                       | 232        | 289      | 2.72             | 5.59   | 41                  | 54         | 67       | 0.63             | 1.30 | 42,966                               |
| Gambia        | 14                        | 18         | 22       | 0.20             | 0.42   | 42                  | 55         | 68       | 0.63             | 1.30 | 3,229                                |
| Israel        | 21                        | 26         | 31       | 0.25             | 0.51   | 53                  | 66         | 79       | 0.63             | 1.30 | 3,952                                |
| India         | 6,433                     | 8,509      | 10,699   | 103.80           | 213.30 | 39                  | 52         | 65       | 0.63             | 1.29 | 1,647,998                            |
| Morocco       | 440                       | 543        | 651      | 5.13             | 10.54  | 54                  | 67         | 80       | 0.63             | 1.29 | 81,494                               |
| Libya         | 66                        | 92         | 120      | 1.30             | 2.68   | 32                  | 44         | 57       | 0.62             | 1.28 | 20,867                               |
| Egypt         | 408                       | 457        | 508      | 2.42             | 4.98   | 105                 | 118        | 131      | 0.62             | 1.28 | 38,877                               |
| Pakistan      | 832                       | 1,087      | 1,357    | 12.77            | 26.23  | 41                  | 53         | 66       | 0.62             | 1.28 | 205,228                              |
| United States | 18,948                    | 21,442     | 24,071   | 124.66           | 256.14 | 94                  | 107        | 120      | 0.62             | 1.27 | 2,009,930                            |
| Namibia       | 12                        | 19         | 26       | 0.34             | 0.70   | 22                  | 34         | 47       | 0.62             | 1.27 | 5,488                                |
| Senegal       | 137                       | 186        | 238      | 2.45             | 5.03   | 35                  | 47         | 60       | 0.62             | 1.27 | 39,540                               |
| Burkina Faso  | 82                        | 144        | 209      | 3.08             | 6.34   | 16                  | 29         | 42       | 0.62             | 1.27 | 49,942                               |
| Algeria       | 410                       | 499        | 592      | 4.41             | 9.07   | 57                  | 70         | 83       | 0.62             | 1.27 | 71,538                               |
| Lebanon       | 19                        | 22         | 26       | 0.18             | 0.36   | 66                  | 78         | 91       | 0.62             | 1.27 | 2,838                                |
| Mauritania    | 6                         | 9          | 13       | 0.18             | 0.36   | 20                  | 32         | 45       | 0.62             | 1.27 | 2,857                                |
| Jordan        | 12                        | 17         | 21       | 0.22             | 0.45   | 34                  | 46         | 59       | 0.61             | 1.26 | 3,592                                |
| Syria         | 203                       | 263        | 326      | 2.99             | 6.14   | 42                  | 54         | 67       | 0.61             | 1.26 | 48,738                               |
| Iraq          | 239                       | 324        | 414      | 4.26             | 8.75   | 34                  | 47         | 60       | 0.61             | 1.26 | 69,555                               |
| Saudi Arabia  | 42                        | 64         | 87       | 1.10             | 2.27   | 23                  | 35         | 48       | 0.61             | 1.26 | 18,053                               |
| Yemen         | 25                        | 36         | 49       | 0.58             | 1.19   | 26                  | 39         | 51       | 0.61             | 1.26 | 9,461                                |
| Mali          | 105                       | 173        | 245      | 3.39             | 6.97   | 19                  | 31         | 44       | 0.61             | 1.25 | 55,655                               |
| Chad          | 180                       | 231        | 284      | 2.54             | 5.23   | 43                  | 55         | 68       | 0.61             | 1.25 | 41,782                               |
| Spain         | 1,371                     | 1,650      | 1,943    | 13.93            | 28.62  | 60                  | 72         | 85       | 0.61             | 1.25 | 229,705                              |
| Portugal      | 321                       | 366        | 413      | 2.25             | 4.63   | 86                  | 98         | 111      | 0.61             | 1.25 | 37,153                               |
| Albania       | 62                        | 69         | 77       | 0.37             | 0.77   | 99                  | 111        | 124      | 0.60             | 1.23 | 6,206                                |
| Turkmenistan  | 90                        | 115        | 141      | 1.23             | 2.53   | 44                  | 56         | 69       | 0.60             | 1.23 | 20,479                               |
| Greece        | 215                       | 246        | 280      | 1.59             | 3.26   | 80                  | 92         | 105      | 0.59             | 1.22 | 26,793                               |
| Italy         | 1,103                     | 1,255      | 1,414    | 7.57             | 15.56  | 86                  | 98         | 110      | 0.59             | 1.21 | 128,138                              |
| Eritrea       | 14                        | 24         | 34       | 0.47             | 0.96   | 18                  | 30         | 42       | 0.59             | 1.21 | 7,954                                |
| Iran          | 479                       | 645        | 819      | 8.27             | 17.00  | 34                  | 46         | 58       | 0.59             | 1.21 | 140,542                              |
| Uzbekistan    | 250                       | 299        | 352      | 2.47             | 5.09   | 59                  | 71         | 84       | 0.59             | 1.21 | 42,089                               |
| Zambia        | 143                       | 177        | 213      | 1.71             | 3.51   | 49                  | 61         | 73       | 0.59             | 1.21 | 29,111                               |
| Zimbabwe      | 143                       | 177        | 213      | 1.71             | 3.51   | 49                  | 61         | 73       | 0.59             | 1.21 | 29,111                               |
| Somalia       | 118                       | 148        | 180      | 1.50             | 3.09   | 46                  | 58         | 70       | 0.59             | 1.21 | 25,621                               |
| Turkey        | 1,855                     | 2,178      | 2,519    | 16.15            | 33.19  | 67                  | 79         | 91       | 0.59             | 1.20 | 275,553                              |
| Cambodia      | 408                       | 462        | 520      | 2.74             | 5.62   | 87                  | 99         | 111      | 0.59             | 1.20 | 46,691                               |
| Bulgaria      | 484                       | 549        | 617      | 3.22             | 6.62   | 88                  | 100        | 112      | 0.59             | 1.20 | 55,037                               |
| Thailand      | 1,909                     | 2,236      | 2,580    | 16.31            | 33.51  | 69                  | 80         | 93       | 0.59             | 1.20 | 278,690                              |
| Taiwan        | 10                        | 11         | 12       | 0.06             | 0.13   | 87                  | 99         | 111      | 0.59             | 1.20 | 1,103                                |
| Afghanistan   | 316                       | 406        | 502      | 4.54             | 9.32   | 41                  | 52         | 65       | 0.58             | 1.20 | 77,562                               |
| Macedonia     | 47                        | 54         | 62       | 0.38             | 0.78   | 72                  | 83         | 96       | 0.58             | 1.20 | 6,501                                |
| Niger         | 127                       | 202        | 280      | 3.71             | 7.63   | 20                  | 32         | 44       | 0.58             | 1.20 | 63,616                               |
| Angola        | 147                       | 184        | 222      | 1.81             | 3.72   | 47                  | 58         | 71       | 0.58             | 1.19 | 31,399                               |
| Croatia       | 176                       | 197        | 221      | 1.10             | 2.25   | 92                  | 104        | 116      | 0.58             | 1.18 | 19,038                               |
| Puerto Rico   | 7                         | 8          | 9        | 0.04             | 0.08   | 105                 | 117        | 129      | 0.57             | 1.18 | 712                                  |
| Tanzania      | 726                       | 891        | 1,065    | 8.25             | 16.95  | 50                  | 62         | 74       | 0.57             | 1.17 | 144,322                              |
| Australia     | 3,418                     | 4,143      | 4,907    | 36.23            | 74.46  | 54                  | 65         | 77       | 0.57             | 1.17 | 634,882                              |

Table S6: Top forty countries with the highest total area of high SOC soils.

| High SOC Soils                   | Total Soil Organic Carbon | Average per Hectare | Agricultural Area |
|----------------------------------|---------------------------|---------------------|-------------------|
|                                  | T <sub>0</sub>            | T <sub>0</sub>      | Area              |
| Country                          | Megatons ( t C * 106)     | tC/ha               | km <sup>2</sup>   |
| Indonesia                        | 3,385                     | 256                 | 132,378           |
| Russia                           | 2,013                     | 279                 | 72,203            |
| Malaysia                         | 562                       | 292                 | 19,251            |
| New Zealand                      | 246                       | 194                 | 12,710            |
| Canada                           | 254                       | 233                 | 10,887            |
| Norway                           | 187                       | 230                 | 8,135             |
| Brazil                           | 82                        | 105                 | 7,783             |
| Colombia                         | 111                       | 177                 | 6,272             |
| Chile                            | 112                       | 189                 | 5,908             |
| Ecuador                          | 104                       | 178                 | 5,823             |
| Finland                          | 125                       | 265                 | 4,711             |
| Japan                            | 105                       | 223                 | 4,697             |
| United States                    | 221                       | 526                 | 4,196             |
| Peru                             | 64                        | 180                 | 3,569             |
| Sweden                           | 86                        | 251                 | 3,420             |
| Ethiopia                         | 32                        | 128                 | 2,468             |
| Democratic Republic of the Congo | 40                        | 173                 | 2,316             |
| Australia                        | 38                        | 169                 | 2,242             |
| Kazakhstan                       | 80                        | 395                 | 2,014             |
| Vietnam                          | 56                        | 283                 | 1,997             |
| Papua New Guinea                 | 36                        | 187                 | 1,923             |
| Rwanda                           | 24                        | 155                 | 1,536             |
| China                            | 42                        | 374                 | 1,133             |
| Philippines                      | 26                        | 243                 | 1,081             |
| Belarus                          | 33                        | 393                 | 843               |
| Ireland                          | 21                        | 261                 | 811               |
| Cameroon                         | 11                        | 134                 | 806               |
| India                            | 19                        | 234                 | 805               |
| Tanzania                         | 8                         | 104                 | 768               |
| Thailand                         | 20                        | 393                 | 516               |
| Myanmar                          | 15                        | 315                 | 478               |
| Bangladesh                       | 18                        | 392                 | 465               |
| Ukraine                          | 16                        | 357                 | 459               |
| North Korea                      | 10                        | 238                 | 419               |
| Argentina                        | 8                         | 212                 | 395               |
| Kenya                            | 6                         | 145                 | 393               |
| Bhutan                           | 6                         | 183                 | 354               |
| Guatemala                        | 6                         | 181                 | 337               |
| United Kingdom                   | 8                         | 255                 | 303               |
| Cambodia                         | 13                        | 417                 | 301               |



## Supplementary Figures:

Figure S1: High soil organic carbon (SOC) and sandy soils. Distribution of high SOC and sandy soils which were excluded from the analysis, i.e. soils with a bulk density of less than  $1.0 \text{ g/cm}^3$ , and/or SOC greater than  $400 \text{ t C/ha}$  in the top 15cm, and soils with a sand content equal to or greater than 85 %. Maps were produced based upon a geospatial analysis of datasets from the SoilsGrids250 database (ISRIC; Hengl et al, 2017), using ESRI ArcGIS software (version 10.3; [www.esri.com](http://www.esri.com)).

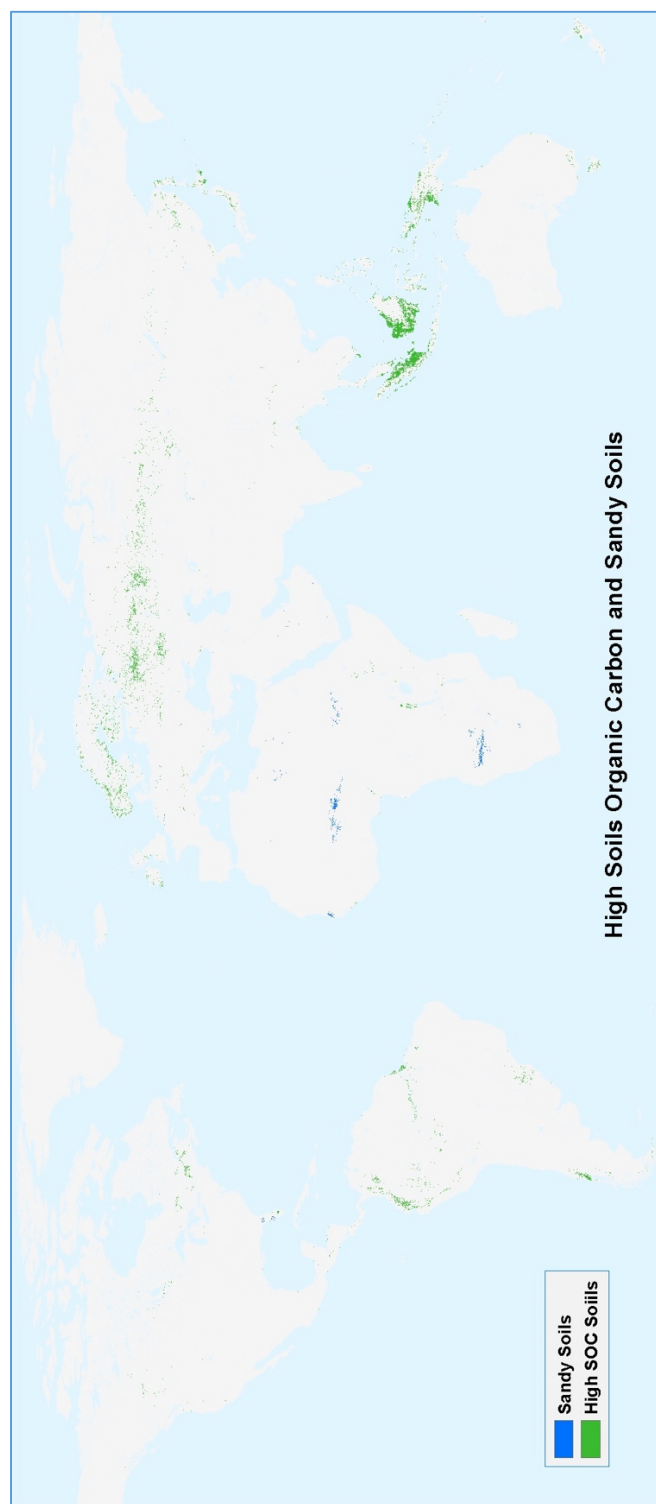

Figure S2: Annual increase in soil organic carbon (SOC) – Africa. Annual increase in soil organic carbon (SOC) in the top 30 cm, on all available cropland soils globally (i.e. those not excluded from the analysis as high SOC or sandy soils) under the medium scenario (i.e. an increase in percent SOC of 0.27 over 20 years). Maps were produced based upon a geospatial analysis of datasets from the SoilsGrids250 database (ISRIC; Hengl et al, 2017), using ESRI ArcGIS software (version 10.3; www.esri.com).

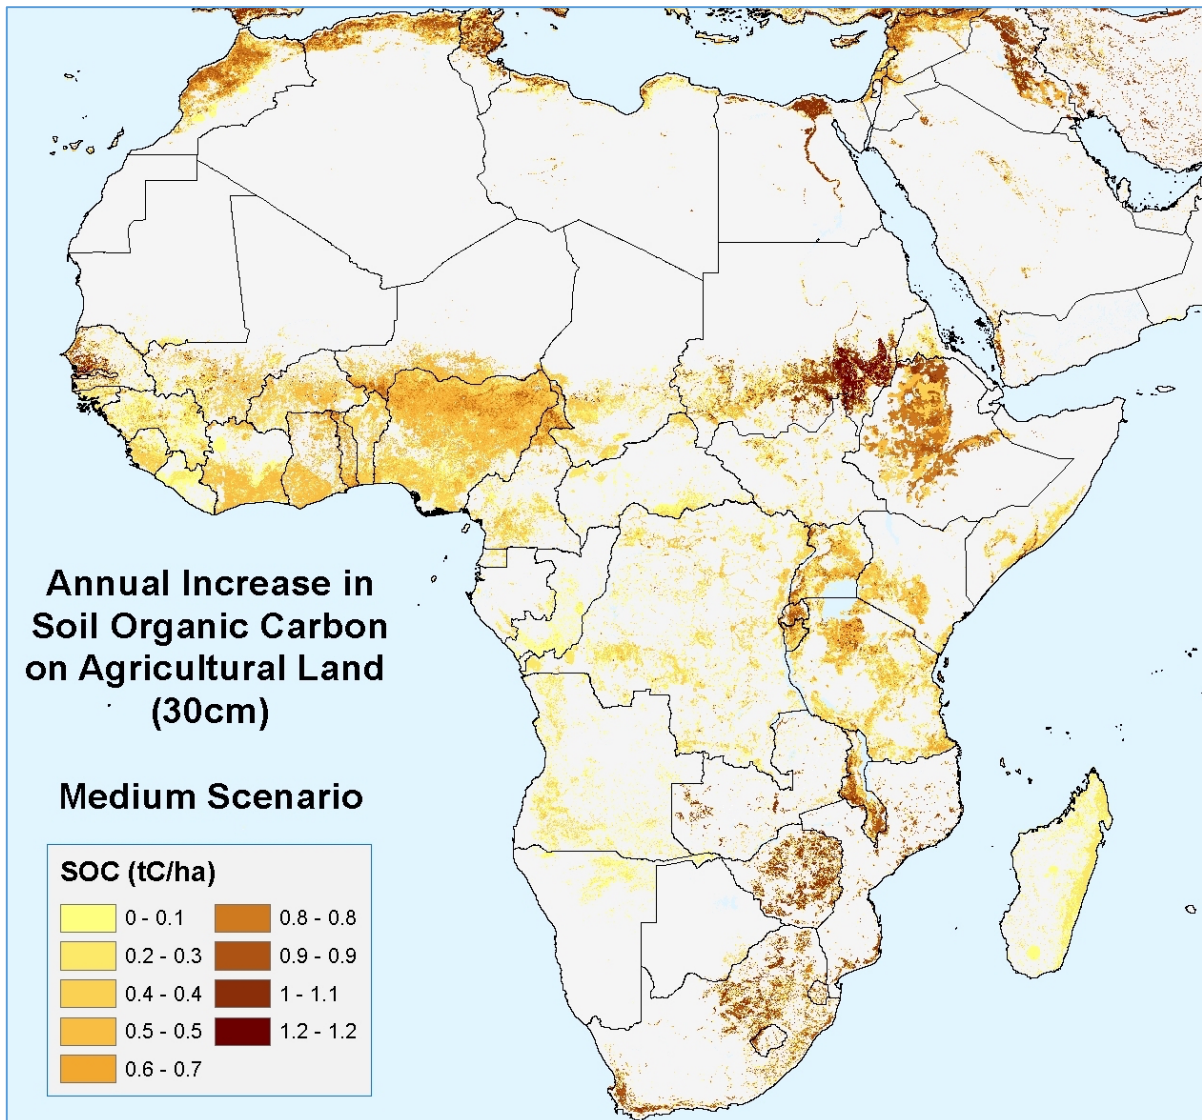

Figure S3: Annual increase in soil organic carbon (SOC) – South America. Annual increase in soil organic carbon (SOC) in the top 30 cm, on all available cropland soils globally (i.e. those not excluded from the analysis as high SOC or sandy soils) under the medium scenario (i.e. an increase in percent SOC of 0.27 over 20 years). Maps were produced based upon a geospatial analysis of datasets from the SoilsGrids250 database (ISRIC; Hengl et al, 2017), using ESRI ArcGIS software (version 10.3; www.esri.com).

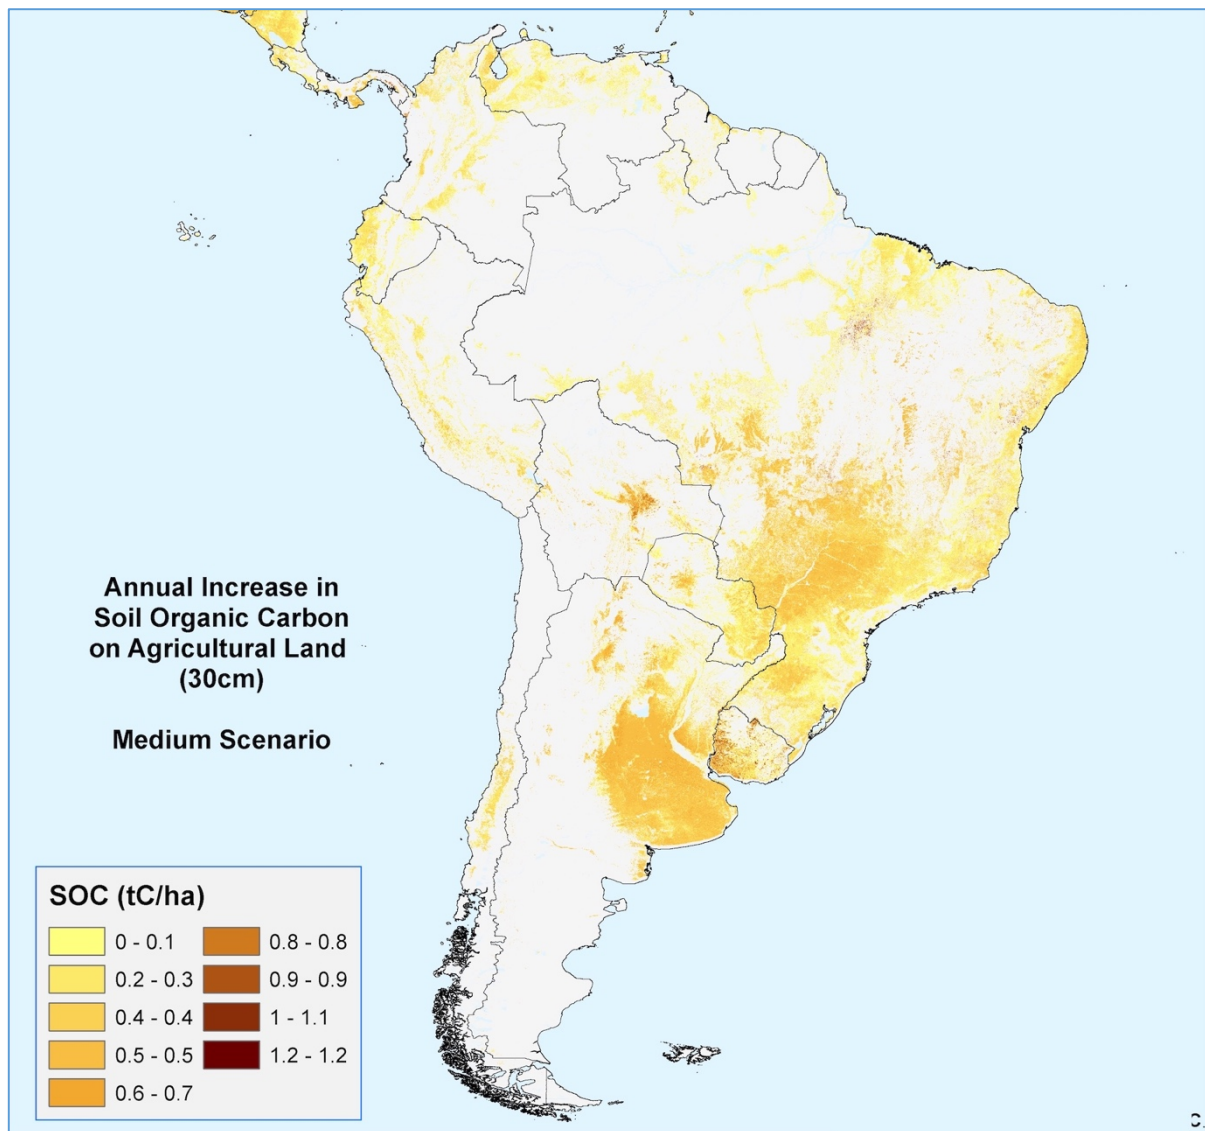



Figure S4: Annual increase in soil organic carbon (SOC) – South Asia. Annual increase in soil organic carbon (SOC) in the top 30 cm, on all available cropland soils globally (i.e. those not excluded from the analysis as high SOC or sandy soils) under the medium scenario (i.e. an increase in percent SOC of 0.27 over 20 years). Maps were produced based upon a geospatial analysis of datasets from the SoilsGrids250 database (ISRIC; Hengl et al, 2017), using ESRI ArcGIS software (version 10.3; www.esri.com).

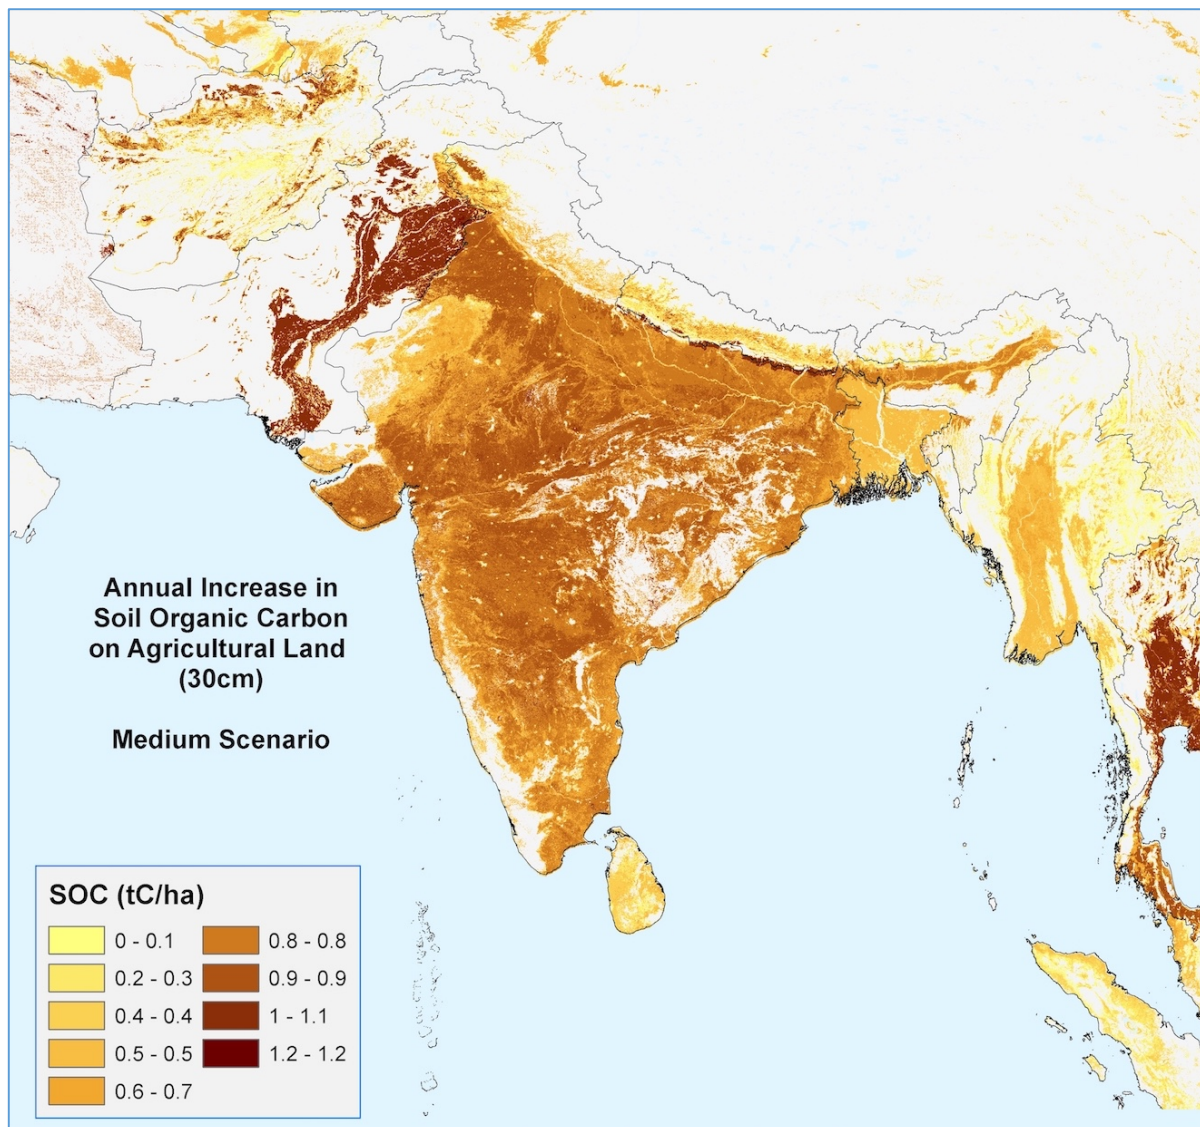

Figure S5: Annual increase in soil organic carbon (SOC) – Southeast Asia. Annual increase in soil organic carbon (SOC) in the top 30 cm, on all available cropland soils globally (i.e. those not excluded from the analysis as high SOC or sandy soils) under the medium scenario (i.e. an increase in percent SOC of 0.27 over 20 years), and distribution of the high SOC soils. Maps were produced based upon a geospatial analysis of datasets from the SoilsGrids250 database (ISRIC; Hengl et al, 2017), using ESRI ArcGIS software (version 10.3; www.esri.com).

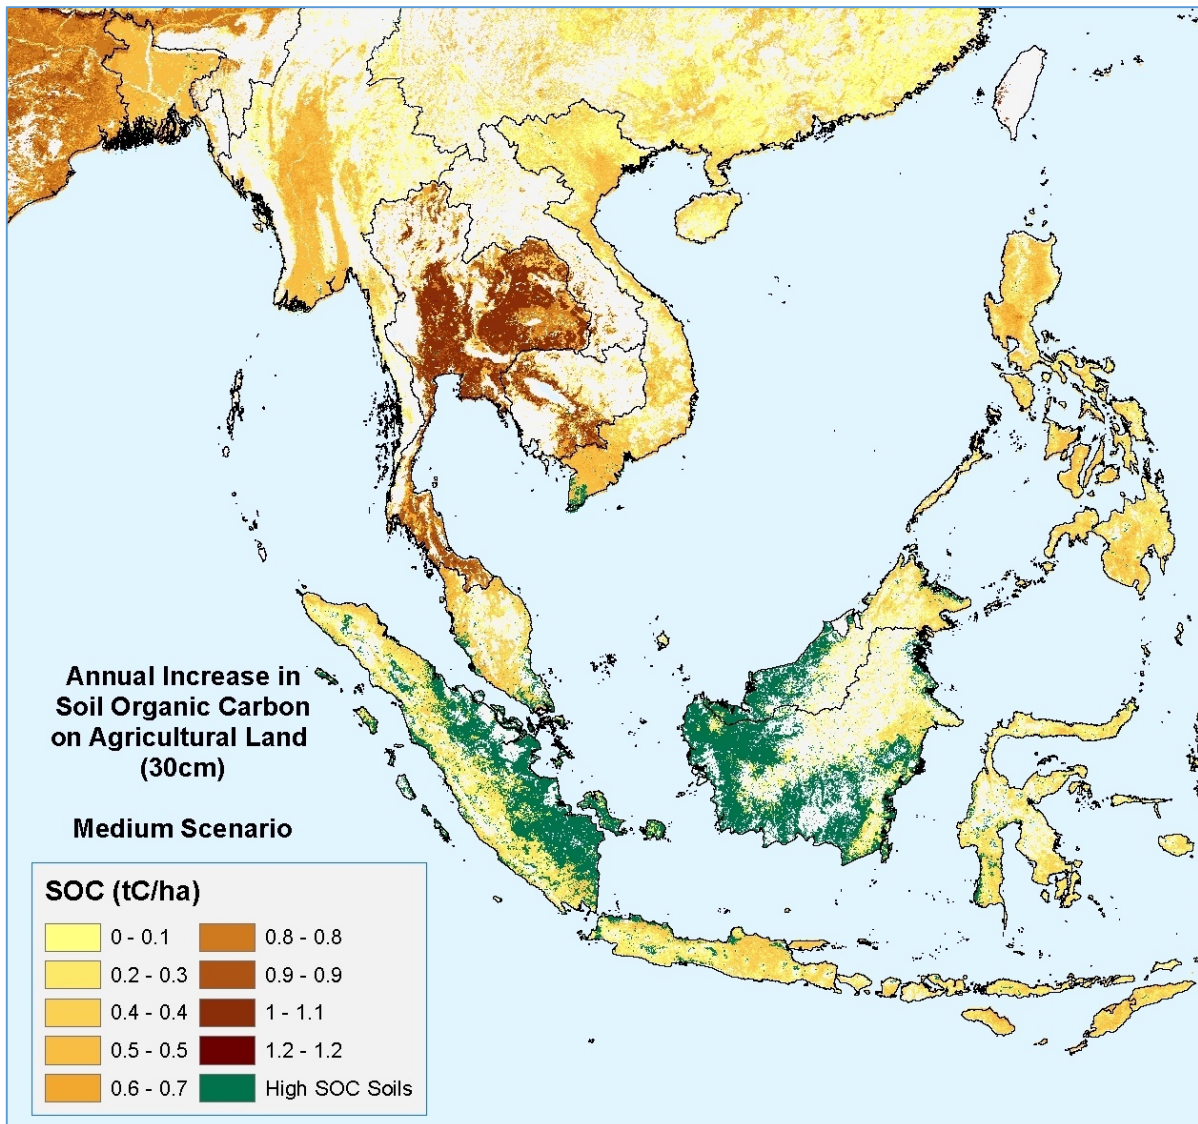



Figure S6: Annual increase in soil organic carbon (SOC) – East Asia. Annual increase in soil organic carbon (SOC) in the top 30 cm, on all available cropland soils globally (i.e. those not excluded from the analysis as high SOC or sandy soils) under the medium scenario (i.e. an increase in percent SOC of 0.27 over 20 years). Maps were produced based upon a geospatial analysis of datasets from the SoilsGrids250 database (ISRIC; Hengl et al, 2017), using ESRI ArcGIS software (version 10.3; www.esri.com).

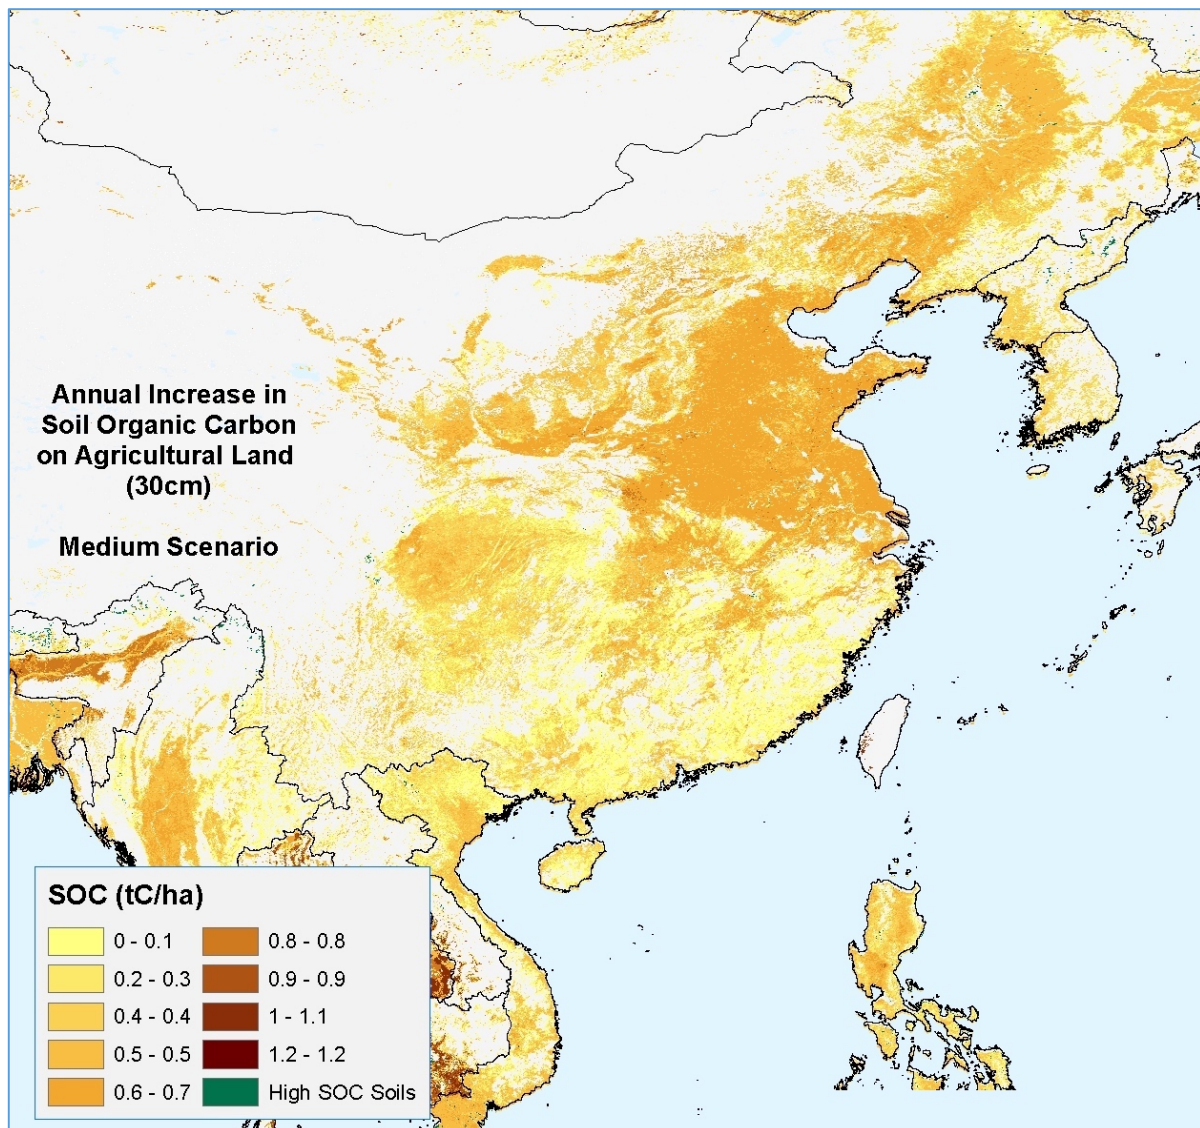

Figure S7: Annual increase in soil organic carbon (SOC) – Europe. Annual increase in soil organic carbon (SOC) in the top 30 cm, on all available cropland soils globally (i.e. those not excluded from the analysis as high or sandy SOC soils) under the medium scenario (i.e. an increase in percent SOC of 0.27 over 20 years). Maps were produced based upon a geospatial analysis of datasets from the SoilsGrids250 database (ISRIC; Hengl et al, 2017), using ESRI ArcGIS software (version 10.3; www.esri.com).

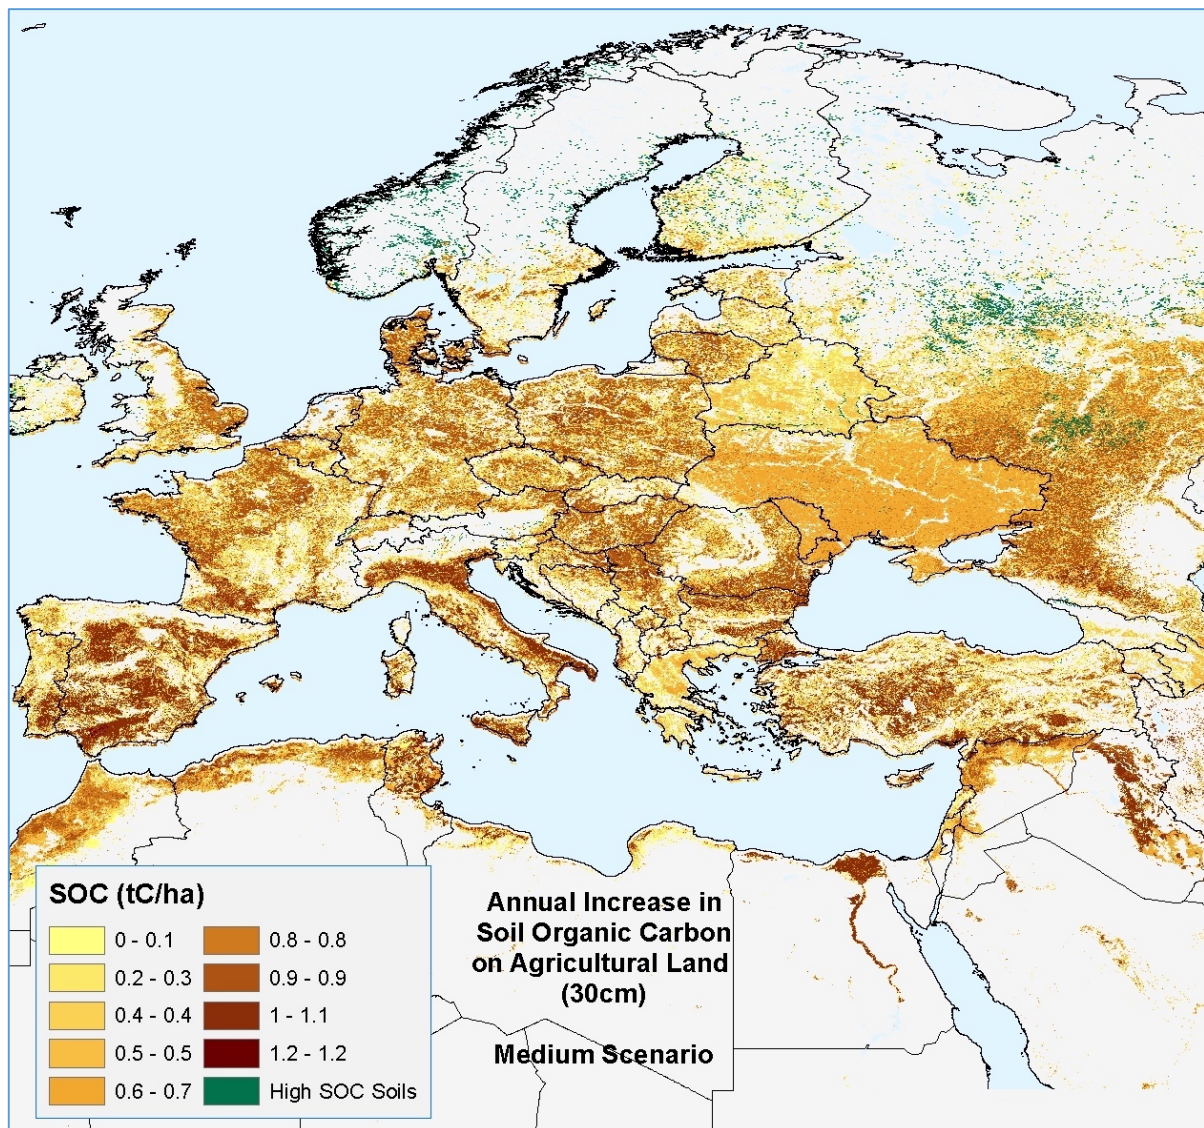



Figure S8: Annual increase in soil organic carbon (SOC) – North America. Annual increase in soil organic carbon (SOC) in the top 30 cm, on all available cropland soils globally (i.e. those not excluded from the analysis as high SOC or sandy soils) under the medium scenario (i.e. an increase in percent SOC of 0.27 over 20 years). Maps were produced based upon a geospatial analysis of datasets from the SoilsGrids250 database (ISRIC; Hengl et al, 2017), using ESRI ArcGIS software (version 10.3; www.esri.com).

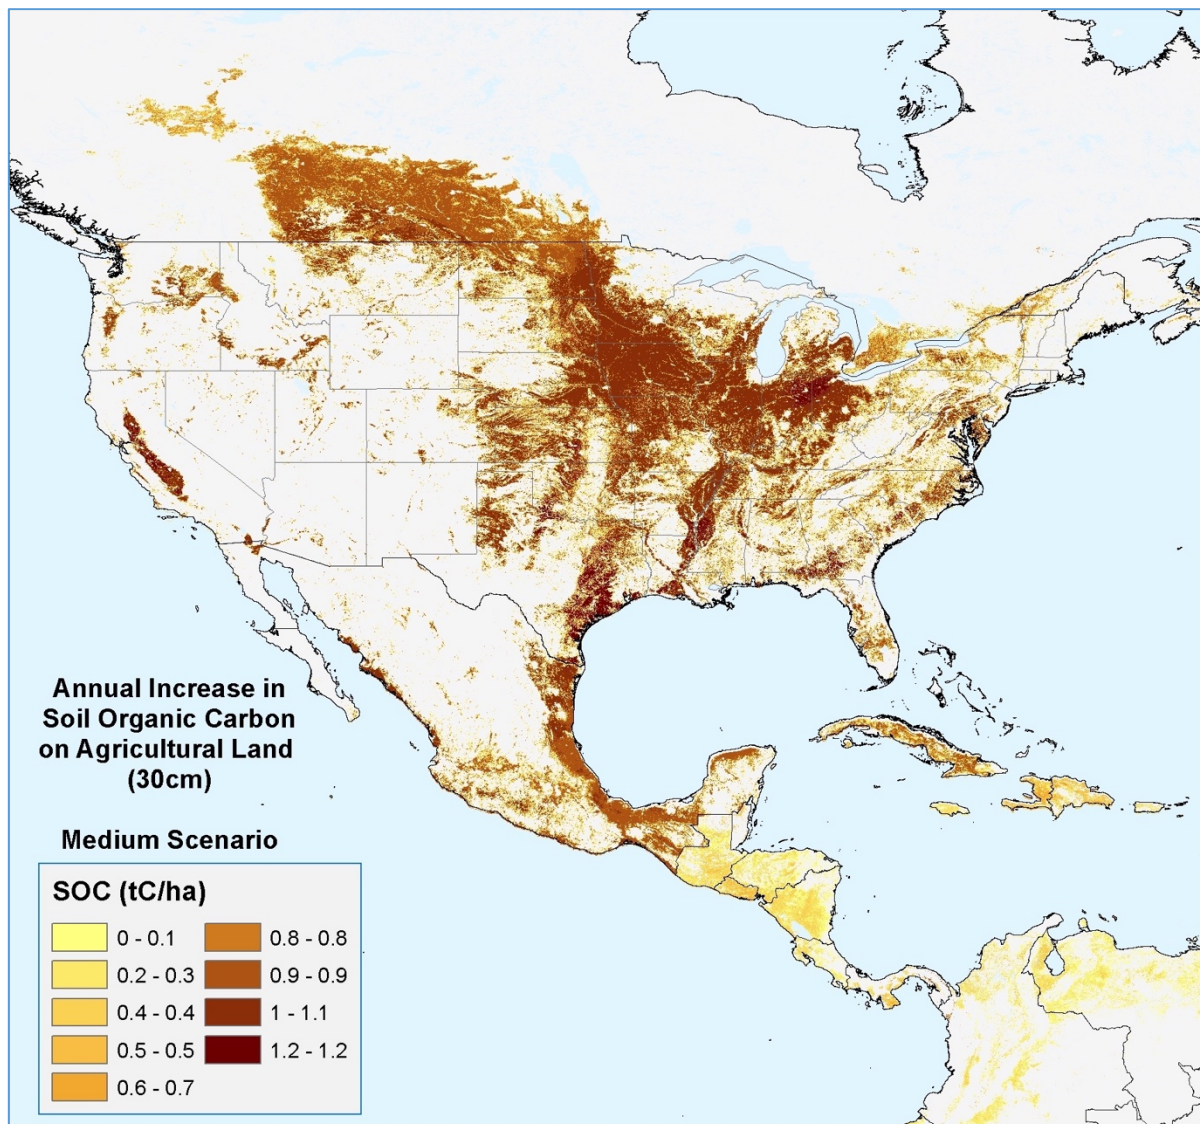



Figure S9: Annual increase in soil organic carbon (SOC) – Australia. Annual increase in soil organic carbon (SOC) in the top 30 cm, on all available cropland soils globally (i.e. those not excluded from the analysis as high SOC or sandy soils) under the medium scenario (i.e. an increase in percent SOC of 0.27 over 20 years). Maps were produced based upon a geospatial analysis of datasets from the SoilsGrids250 database (ISRIC; Hengl et al, 2017), using ESRI ArcGIS software (version 10.3; www.esri.com).

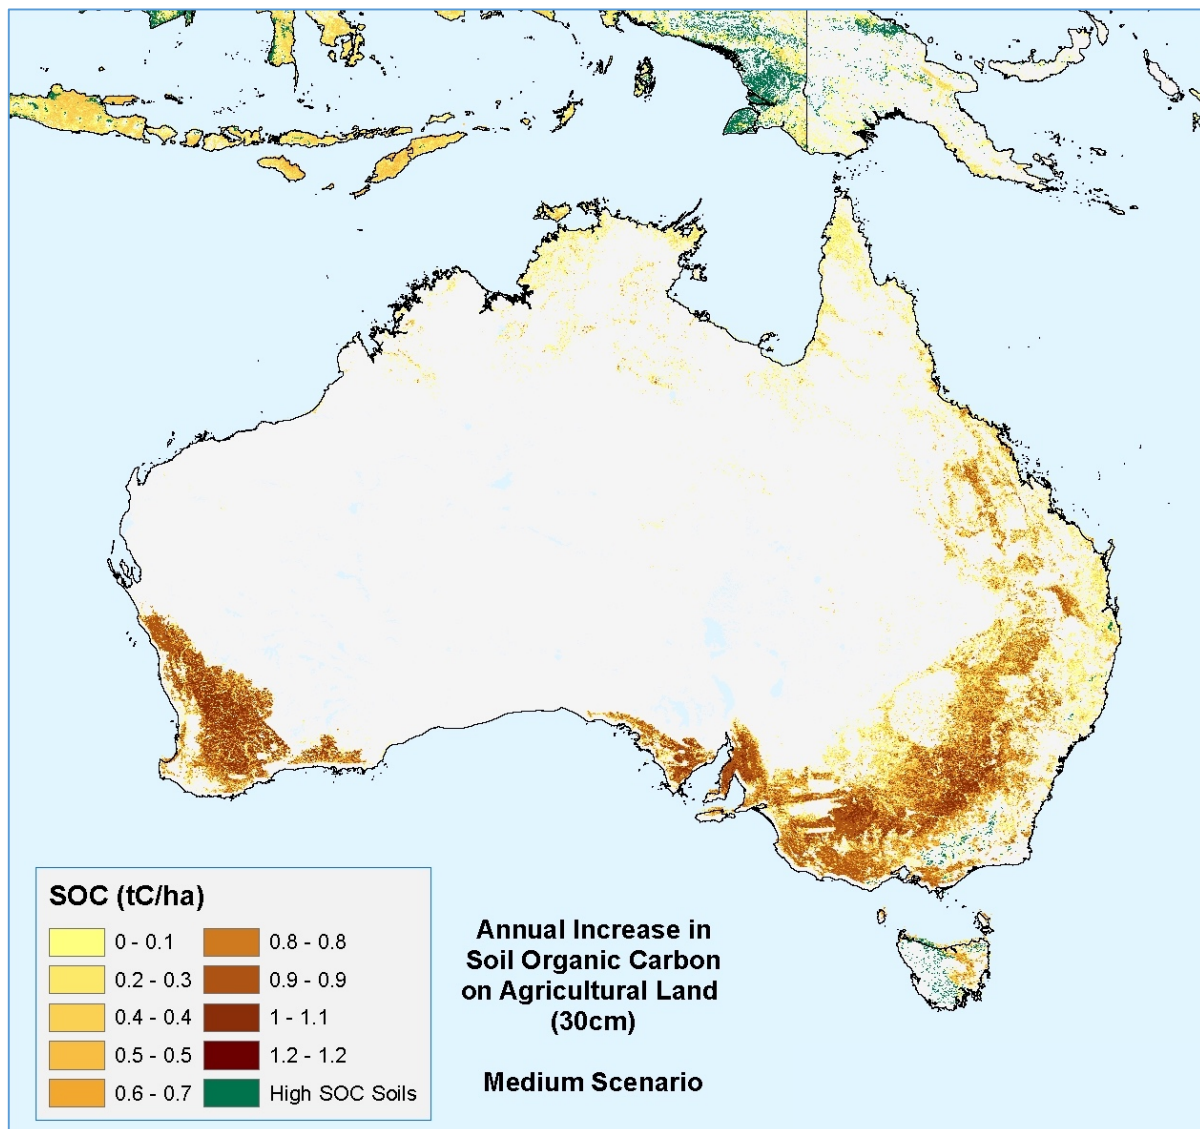

## References

1. Sommer, R. & Bossio, D. Dynamics and climate change mitigation potential of soil organic carbon sequestration. *J. Environ. Manage.* **144**, 83–87 (2014).
2. Hengl, T. *et al.* SoilGrids250m: Global gridded soil information based on machine learning. *PLoS ONE* **12**, e0169748 (2017).
3. Latham, J., Cumani, R., Rosati, I. & Bloise, M. *FAO Global Land Cover (GLC-SHARE) Beta-Release 1.0 Database, Version 1.0 - 2014*. 1–40 (Land and Water Division, FAO, 2014).
4. GADM. GADM Database of Global Administrative Areas. (2005).
